# Supplementary material for: Misaligned feeding impairs memories
Source: eLife journal article supplement (doi:10.7554/elife.09460), 2015-12-10
Supplement: supp [file elife_poa_e09460_Figure_2_source_data_1.xls]

## Sheet: 2a.Food consumption
Misaligned feeding impairs memories. Loh et al. 2015
Source data for Figure 2a
	ALIGNED Food Consumed (g)
Day	AL1	AL2	AL3	AL4	AL5	AL6	AL7	AL8	AL9	AL10	AL11	AL12	AL13	AL14	AL15	AL16		Average
1	2.8	3.1	3	2.5	3	2.4	3.4	3	3.1	3	2.9	2.4	2.9	1.98	2.36	2.15		2.74937
2	3.2	2.9	4	3.4	2.6	2	3.4	3.5	3.5	3	2.7	2.84	2.5	2.82	2.76	2.3		2.96375
3	4.1	3.9	4.1	3.8	4.2	3.2	3.8	3.7	4.1	4	3.9	2.86	2.9	3.1	2.74	2.4		3.55
4	3.5	3.6	5.6	3.4	3.3	3.2	3.9	2.9	3.6	3.2	3.3	2.98	2.6	3.14	3.2	2.6		3.37625
5	3.5	3.8	2.7	3.5	3.9	3.8	4.8	4.1	4.3	4.1	4	3.66	3.6	3.3	3.04	2.73		3.67688
6	3.2	3.4	2.4	3.3	3.7	3.4	3.5	3.9	4.5	3.6	3.5	3.48	2.5	2.96	3.32	3		3.35375
7	3.8	3.9	3.4	3.8	4.4	4	4.5	4.8	4.3	4.1	4.2	3.32	3.4	3.12	3.12	2.75		3.80687
8	3.5	3.1	2.9	3.3	3.1	3	3.1	3.5	4.4	4.5	4	3.22	3.1	3.16	2.66	2.5		3.315
9	3.6	3.5	3.3	3.5	3.9	3.9	3.3	3	4.4	3.8	3.5	3.22	3.2	2.4	2.8	2.05		3.33562
10	3.9	3.4	3.9	3.5	4.1	3.7	3.3	3.3	3.7	3.8	3.1	2.88	3	2.66	2.82	1.88		3.30875
11	2.7	3.5	2.9	4.1	3.9	3.6	4.3	3.6	4.5	4.2	3.3	3	3.2	2.78	2.78	2.3		3.41625
12	4.3	4	4.4	4	4.1	4.7	5	4.6	4.6	3.6	3.9	2.86	3.3	2.76	2.96	2.3		3.83625
13	4.4	2.8	3.1	3	2.9	3.3	4.8	3.3	4.3	3.3	3.3	2.82	4.1	2.36	2.78	2.33		3.30563
14	2.7	3.8	3.3	3.2	3.4	3.4	3.7	3.5	4.5	2.4	3	2.56	4.5	2.52	2.28	2.4		3.1975
	MISALIGNED Food Consumed (g)
Day	MAL1	MAL2	MAL3	MAL4	MAL5	MAL6	MAL7	MAL8	MAL9	MAL10	MAL11	MAL12	MAL13	MAL14	MAL15	MAL16		Average
1	1.9	1.1	1.6	0.9	1.4	1.5	4	3.3	1.7	1.5	1.3	1.5	1.22	1.02	2.73	1.5		1.76063
2	2.8	2.1	1.8	1.9	0.9	1.6	1.3	3.1	1.8	1.7	1.7	1	1.64	1.82	1.77	2.74		1.85438
3	3.1	2.9	3.2	2.7	2.7	2.2	2.8	2.4	2.7	2.8	2.6	1.9	2.28	2.38	2.7	2.12		2.5925
4	3.8	3.2	3.3	2.9	2.8	2.5	3.2	3.4	2.8	3	3.2	1.6	2.74	2.84	2.43	2.78		2.90563
5	3.6	3.8	3.3	3	2.7	2.8	3.1	3.5	3.1	3.1	3.5	1.7	2.88	3.14	2.83	2.08		3.00813
6	4.1	3.6	3	3.4	4.2	3.8	3.6	3.3	2.8	3.4	3.9	1.9	3.12	3.4	3.4	2.9		3.36375
7	4.1	4.5	4	4.4	3.8	4.4	4.5	4.3	3.7	4.1	4.2	2.8	3.18	3.32	3.8	2.94		3.8775
8	3.6	4	3.9	4	4.4	4.5	3.9	3.2	3.4	3.6	3.8	3	2.88	3.5	3.57	2.64		3.61813
9	3.7	4.9	3.3	4.6	3.7	3.6	3.8	3.9	3.7	4	3.8	3.8	2.9	2.98	2.3	2.38		3.585
10	3.7	4	4.1	3.7	4.1	3.8	4.6	4	2.9	3.3	3.8	4	2.74	3.14	3.3	2.32		3.59375
11	4.1	4.6	4.4	3.6	3.9	3.8	3.6	2.9	3.1	3.2	3.5	3.9	3.14	3.62	3.17	2.8		3.58312
12	4.2	4.2	3.6	4	5	3.7	3.9	3.9	3.3	4.4	4.1	4.4	2.92	3.5	2.53	4.48		3.88312
13	3.7	4.1	3	3.7	4.2	3	2.8	2.6	2.8	4.8	3.9	4.2	2.4	3.48	3.13	1.04		3.30313
14	3.8	4.4	3.6	3.8	3.1	3.4	3.9	3.8	2.9	3.7	3.4	4.1	2.2	2.94	2.7	1.9		3.3525

## Sheet: 2b.Body weight
Misaligned feeding impairs memories. Loh et al. 2015
Source data for Figure 2b
	ALIGNED Body Weights (g)
Day	AL1	AL2	AL3	AL4	AL5	AL6	AL7	AL8	AL9	AL10	AL11	AL12	AL13	AL14	AL15	AL16	AL17	AL18	AL19		Average
1	25.1	22.4	24.6	21.6	24.4	24.3	25.2	23.8	25	23.1	19.1	18.9	19.7	20.9	27	26.2	26.6	23.6	25.5		23.5263
2	24.9	22.8	24.7	21.5	24.3	24.9	25.4	23.5	24.8	23.4	19.5	18.3	19.3	20.7	26.6	25.9	26.6	23.5	25.6		23.4842
3	24.6	22.8	24.7	22.1	24.5	24.9	25.1	23.6	24.6	23.4	19.1	18.9	19.7	20.7	26	25.2	26.6	22.7	25.3		23.3947
4	24.7	23.1	25	22.4	24.8	24.8	25.2	23.6	24.7	23.3	19.3	18.7	19.9	21	26.3	25.1	26.3	22.6	25.1		23.4684
5	25.5	23.5	25.4	22.3	24.8	25.1	25.6	23.5	24.7	23.5	19.5	19	19.5	20.7	26.2	25.2	25.7	22.6	25		23.5421
6	25.7	24.2	25.4	22.9	25.2	25.1	26	24.3	25.3	23.8	19.9	19.2	20.1	21.7	26.8	26.2	26.9	24.1	26		24.1474
7	25.2	24	25.4	22.2	25.2	25.3	26.2	23.5	25	23.9	19.5	19.3	19.7	21.4	26.1	24.1	26	22.7	25.5		23.6947
8	25.6	24.4	25.6	23	25.5	25.5	26.4	23.8	25.2	24	19.5	19.6	20.3	21.9	26.6	25.1	26	22.9	25.8		24.0368
9	25.7	25.3	25.7	22.7	26.2	25.2	26.3	23.6	25.3	24	19.7	19.7	20.4	21.7	20.7	25.7	26.9	23.4	25.6		23.8842
10	25.5	25.3	25.8	22.5	25.8	24.8	26.6	23.6	25.1	23.9	19.6	19.4	20	21.7	26.1	25.3	26.1	23.6	25.1		23.9895
11	25.6	24.7	25.4	22.3	25.9	24.7	26.2	23.9	25.3	23.9	19.2	19.4	20.1	21.6	26.2	25.5	26	23.7	25.1		23.9316
12	25.8	25.6	25.9	22.3	25.6	24.7	26.4	23.7	25.6	24.4	18.8	19.9	20.3	21.7	26.1	25.1	26.1	23.5	25.1		24.0316
13	25.9	26.5	26.1	22.8	25.8	25.6	26.9	24.4	25.6	24.1	19.2	20	20.5	22.3	26.6	25.4	26.1	23.8	25.5		24.3737
14	26.2	26	26	22.6	25.9	25.9	27.4	24.4	26.4	24.6	18.3	19.6	19.7	21.6	26.6	24.8	26.7	24.5	25		24.3263
	MISALIGNED Body Weights (g)
Day	MAL1	MAL2	MAL3	MAL4	MAL5	MAL6	MAL7	MAL8	MAL9	MAL10	MAL11	MAL12	MAL13	MAL14	MAL15	MAL16	MAL17	MAL18			Average
1	23.7	24.3	24.8	22.9	20.7	24	26.7	26.7	24.9	27.1	24.4	24.3	20.9	22.5	23.3	21.7	23.6	22.7			23.8444
2	22.9	24	24.8	22.8	20.2	23.2	25.8	26.2	24.3	26	25.6	25.4	21.5	22.8	23.9	22	24.9	23.2			23.8611
3	22.9	23.3	23.9	22.4	19.6	22.9	25.1	26.7	24.6	25.4	23.1	22.4	20.2	23.1	24.1	22.5	24.1	23.9			23.3444
4	23.6	23.6	24.5	23.3	19.9	23.2	24.9	26.9	23.9	25.5	24.6	24.4	21	23	23.7	22.7	23.1	23.3			23.6167
5	23.7	24.1	25	23.4	20.5	23.7	25.1	27.4	24	25.9	23.8	23.8	21	23.8	24.3	24	24.9	24.5			24.05
6	23.5	23.5	24.4	22.4	19.5	23.2	24.3	26.3	23.5	25.6	22.8	23.1	20.2	23.1	23.3	22.5	23.9	23.6			23.2611
7	23.2	23.4	24.7	22.5	19.9	23	24.5	26.4	23.6	25.3	23.9	23.7	21.2	22.5	23.1	22.5	23.5	23.3			23.3444
8	23.3	23.7	24.6	22.5	19.7	23.2	24.4	26.2	23.3	25.3	23	23.1	20.9	22.7	23.2	22.5	23.5	23.8			23.2722
9	23.3	24	25	22.8	20.1	23.4	24.9	26.7	23.7	26.1	23.3	23.8	21.5	23.6	23.3	22.5	23.6	22.9			23.5833
10	24	24.2	25.2	23.1	20.6	23.8	25	26.6	23.8	26.2	22.9	23.4	21.4	23.1	23.6	23.5	23.9	24.3			23.8111
11	24	25.4	25.3	23	20.8	24.3	25.7	27.2	24.4	26.7	23	23.2	21.1	23.5	24.1	23.6	24.2	24.5			24.1111
12	23.7	24.2	25	23	20.5	23.9	25.2	26.5	24.1	25.8	23	23.3	21.2	23.1	23.9	22.6	23.9	24			23.7167
13	23.5	24.7	25.2	23.4	20.5	24.1	25.5	26.3	23.8	26.2	22.5	22.9	20.9	23.1	23.6	22.7	23.9	24.1			23.7167
14	23.7	24.2	25	22.3	20.9	24.4	25.4	26.6	24.2	26.1	22.6	23.3	21.4	23.6	24.3	23.2	24.3	24.4			23.8833
