# Supplementary material for: Misaligned feeding impairs memories
Source: eLife journal article supplement (doi:10.7554/elife.09460), 2015-12-10
Supplement: supp [file elife_poa_e09460_Figure_3_source_data_1.xls]

## Sheet: 3b.Nocturnality
Misaligned feeding impairs memories. Loh et al. 2015
Source data for Figure 3b.
Nocturnality (% activity in the dark)
ALIGNED	MISALIGNED
84.41	53
78.75	63.13
81.73	69.52
76.66	72.66
87.83	75.83
85.57	67.2
93.6	73.56
93.95	38.61

## Sheet: 3c.Power
Misaligned feeding impairs memories. Loh et al. 2015
Source data for Figure 3c.
Power (%V of FFT)
ALIGNED	MISALIGNED
24.01	0.89
20.63	2.13
17.87	5.56
22.14	7.74
20.95	6.39
26.78	4.58
35.32	5.8
23.44	0.13

## Sheet: 3e.Sleep
Misaligned feeding impairs memories. Loh et al. 2015
Source data for Figure 3e.
Day Sleep, ZT 0-12 (min)			Night Sleep, ZT 13-24 (min)			24 hr Sleep, ZT 0-24 (min)
ALIGNED	MISALIGNED		ALIGNED	MISALIGNED		ALIGNED	MISALIGNED
472.64	294.842		138.867	316.94		611.507	611.782
466.902	247.61		141.25	310.967		608.152	558.577
499.14	325.705		165.765	377.568		664.905	703.273
491.11	379.967		127.502	268.965		618.612	648.932
476.352	413.42		179.475	355.267		655.827	768.687
472.548	381.256		212.628	402.374		685.177	783.63
467.75	335.866		97.8742	363.69		565.624	699.556
499.48	231.787		120.823	328.219		620.303	560.006
541.023	291.232		191.316	353.023		732.339	644.255
382.906	375.158		98.9717	391.605		481.877	766.763

## Sheet: 3-S1a.Sleep bouts
Misaligned feeding impairs memories. Loh et al. 2015
Source data for Figure 3-figure supplement 1a.
Day Sleep Bouts			Night Sleep Bouts			24 hr Sleep Bouts
ALIGNED	MISALIGNED		ALIGNED	MISALIGNED		ALIGNED	MISALIGNED
16	27		9	20		25	47
21	24		18	16		39	40
26	32		29	15		55	47
20	31		11	12		31	43
22	26		24	13		46	39
23	31		29	20		52	51
26	34		17	22		43	56
23	23		30	12		53	35
25	30		35	16		60	46
26	31		25	16		51	47

## Sheet: 3-S1b.Sleep bout duration
Misaligned feeding impairs memories. Loh et al. 2015
Source data for Figure 3-figure supplement 1b.
Day Average Bout Duration (min)			Night Average Sleep Bout Duration (min)			24 hr Average Sleep Bout Duration (min)
ALIGNED	MISALIGNED		ALIGNED	MISALIGNED		ALIGNED	MISALIGNED
32.8125	12.8889		17.6667	17.35		27.36	14.7872
24.3333	12.5833		9.27778	21.625		17.3846	16.2
21.6923	12.0625		7.51724	27.8667		14.2182	17.1064
26.8	14.0645		13.5455	18.3333		22.0968	15.2558
23.5455	19.9615		8.75	33		15.8261	24.3077
22.0435	14.5484		8.72414	24.5		14.6154	18.451
19.8846	11.7647		6.47059	19.5		14.5814	14.8036
24.1739	12.3478		6.16667	33.6667		13.9811	19.6571
23.92	12.5		8.37143	25.9375		14.85	17.1739
20.3077	15.2903		4.76	28.1875		12.6863	19.6809

## Sheet: 3-S1c.Sleep distribution
Misaligned feeding impairs memories. Loh et al. 2015
Source data for Figure 3-figure supplement 1c.
	ALIGNED Bouts													MISALIGNED Bouts
Bout duration (min)	AL1	AL2	AL3	AL4	AL5	AL6	AL7	AL8	AL9	AL10			Bout duration (min)	MAL1	MAL2	MAL3	MAL4	MAL5	MAL6	MAL7	MAL8	MAL9	MAL10
1		2	2	1	1	1	1	3	2	2			1	3	4	4	7	2	5	2	4	2	2
2	1	6	7	6	6	16	9	12	16	17			2	8	9	7	6	8	11	18	12	17	3
3	4	1	3	1	5	2	6	3	7	2			3	5		1	5	2	3	2	2	7	8
4		1	6	1	4	3	1	5	8	4			4	4	2	6	2	1	2		1	2	1
5	1		2	2	1	3		1	2	4			5			5	2	2	1		3		1
6	1	3			5	1	3	5	1	2			6	3	2	1	2	1	3	3		1	3
7		1	3		2		3	3	3	1			7	2	1	2	1	1	1	4	1	1
8		2	6		3	1	3	2	2	1			8	2			1	2	3	2		1	2
9	2	1	2			2	2		1	1			9	1	2					2			1
10	1	3			1	2		1	1				10	1	1	1				2	1		1
11		1	3	1		3	2		2	1			11		1				1
12		2		2	1	2	2		1	1			12			2	2		1				1
13	2	3		1	1	1		1		1			13	2	3	2
14			1			2	1						14	2	1				2	2			1
15	1		2	1		1		2		1			15		1	1			1	1		1	1
16	1		1	1	1			1	1				16			1		1		1		1	1
17		1	2	1	1		1	1					17	1									2
18							2			1			18					1				1	1
19		1	2		1	1		2		2			19				1			1
20		1			1	1				1			20					2	1	1	1		1
21	1			1	1				2				21		2		2					1	3
22			1	3									22	1	1	1			1
23						1		1					23	1	1		1	2	1		1
24		1			1		1	1					24	1		1		2		1		1	1
25		1	2			1		1	1				25	1								1
26	1							1	1				26	1	1	1	2		2
27				1	2								27		1	1
28			1	1	1	1							28		1								2
29			1			1	1						29	1					1	1			1
30										1			30				1	1				1
31										2			31				1	1				1
32		1											32	1					1	3			2
33								1					33			1			1	2
34			2	1	1			1					34
35													35		1		2	1	1	2
36		2	2		1					1			36			2					1
37	1	2	1					1		1			37										1
38							1						38	1				1					1
39													39	1		1			1		1
40													40						1	2			1
41	1									1			41				1		2	2
42				1									42
43													43				1	2					1
44			1	1		1							44					1
45													45
46					1								46
47		1											47
48	2						1						48					1	1		1
49													49			1						1
50			1										50									1
51				1				1					51
52						1							52
53		1							1				53	1			1			1
54						1		1					54
55					1				1				55		1		1					1
56										2			56
57				1		1			1				57					1
58	1				1								58		2								1
59							1						59	1
60	1												60									2
61													61		1		1	1
62									1				62										1
63									2				63		1	1
64													64			1					1
65													65			1
66													66
67													67								1
68									1				68	1
69													69
70													70
71			1						1				71
72													72				1						1
73	1				1								73
74	1												74			1
75					1								75			1
76													76	1							1
77													77
78						1							78
79													79
80													80
81													81								1
82													82								1
83													83						1			1
84													84
85								1					85
86													86
87													87
88	1									1			88					1
89							1						89
90													90
91													91								1
92													92
93													93						1
94				1									94
95				1									95
96													96
97								1	1				97									1
98													98
99													99
100						1							100							1
101													101
102													102
103													103
104													104
105							1						105
106													106
107													107
108													108
109													109									1
110													110
111													111					1
112													112
113													113
114													114
115													115
116													116
117													117
118													118
119													119
120		1											120
121													121
122													122
123													123
124													124
125													125
126													126					1					1
127													127
128													128
129													129
130													130							1

## Sheet: 3-S1d.Sleep fragmentation
Misaligned feeding impairs memories. Loh et al. 2015
Source data for Figure 3-figure supplement 1d.
	ALIGNED Bouts (%)
Bout Duration	AL1	AL2	AL3	AL4	AL5	AL6	AL7	AL8	AL9	AL10		Average
< 30 min	64	79.4872	85.4545	77.4194	84.7826	88.4615	88.3721	86.7925	85	84.3137		82.4083
30-60 min	24	17.9487	12.7273	16.129	10.8696	7.69231	6.97674	9.43396	5	13.7255		12.4503
60-90 min	12	0	1.81818	0	4.34783	1.92308	2.32558	1.88679	8.33333	1.96078		3.45956
90-120 min	0	2.5641	0	6.45161	0	1.92308	2.32558	1.88679	1.66667	0		1.68178
> 120 min	0	0	0	0	0	0	0	0	0	0		0
	MISALIGNED Bouts (%)
Bout Duration	MAL1	MAL2	MAL3	MAL4	MAL5	MAL6	MAL7	MAL8	MAL9	MAL10		Average
< 30 min	85.1064	85	78.7234	81.3953	71.7949	78.4314	76.7857	74.2857	82.6087	78.7234		79.2855
30-60 min	10.6383	12.5	10.6383	16.2791	20.5128	15.6863	21.4286	8.57143	10.8696	14.8936		14.2018
60-90 min	4.25532	2.5	10.6383	2.32558	2.5641	1.96078	0	17.1429	2.17391	4.25532		4.78162
90-120 min	0	0	0	0	2.5641	1.96078	1.78571	0	4.34783	0		1.06584
> 120 min	0	0	0	0	2.5641	1.96078	0	0	0	2.12766		0.665255
