# Supplementary material for: Misaligned feeding impairs memories
Source: eLife journal article supplement (doi:10.7554/elife.09460), 2015-12-10
Supplement: supp [file elife_poa_e09460_Figure_4_source_data_1.xls]

## Sheet: 4a.SCN biolum
Misaligned feeding impairs memories. Loh et al. 2015
Source data for Figure 4a.
SCN representative trace
ALIGNED		MISALIGNED
ZT	Baseline-subtracted bioluminescence	ZT	Baseline-subtracted bioluminescence
0.64931	205.532	0.65	190.264
0.65625	192.6	0.65694	175.13
0.66319	189.789	0.66389	170.194
0.67014	175.325	0.67083	154.011
0.67708	160.654	0.67778	137.974
0.68403	144.938	0.68472	120.391
0.69097	130.517	0.69167	102.651
0.69792	116.556	0.69861	85.4457
0.70486	104.016	0.70556	70.2423
0.71181	91.9501	0.7125	54.9165
0.71875	81.084	0.71944	39.9491
0.72569	70.7689	0.72639	27.4625
0.73264	61.5302	0.73333	14.9146
0.73958	53.0816	0.74028	3.59894
0.74653	33.2551	0.74722	-16.9956
0.75347	24.2556	0.75417	-26.3579
0.76042	15.5371	0.76111	-35.4145
0.76736	6.55808	0.76806	-43.359
0.77431	-2.62576	0.775	-50.3948
0.78125	-11.8389	0.78194	-56.9471
0.78819	-21.4945	0.78889	-63.5349
0.79514	-31.1804	0.79583	-69.7516
0.80208	-41.4951	0.80278	-75.8318
0.80903	-52.4636	0.80972	-81.8726
0.81597	-63.4295	0.81667	-87.6388
0.82292	-75.0188	0.82361	-93.6555
0.82986	-85.78	0.83056	-99.8408
0.83681	-96.5553	0.8375	-105.541
0.84375	-107.095	0.84444	-111.091
0.85069	-117.407	0.85139	-116.603
0.85764	-127.209	0.85833	-122.189
0.86458	-136.92	0.86528	-127.702
0.87153	-146.318	0.87222	-133.691
0.87847	-155.367	0.87917	-139.103
0.88542	-163.599	0.88611	-144.031
0.89236	-170.789	0.89306	-148.552
0.89931	-178.144	0.9	-153.066
0.90625	-184.745	0.90694	-157.286
0.91319	-191.246	0.91389	-160.951
0.92014	-197.176	0.92083	-165.186
0.92708	-202.497	0.92778	-168.745
0.93403	-206.623	0.93472	-172.037
0.94097	-210.843	0.94167	-174.677
0.94792	-214.667	0.94861	-177.205
0.95486	-217.689	0.95556	-178.913
0.96181	-220.526	0.9625	-180.054
0.96875	-222.554	0.96944	-180.507
0.97569	-223.965	0.97639	-180.835
0.98264	-224.781	0.98333	-180.655
0.98958	-224.955	0.99028	-179.794
0.99653	-224.043	0.99722	-178.463
1.00347	-222.471	1.00417	-176.384
1.01042	-220.634	1.01111	-173.846
1.01736	-218.733	1.01806	-171.14
1.02431	-216.216	1.025	-168.184
1.03125	-212.736	1.03194	-164.765
1.03819	-208.646	1.03889	-161.111
1.04514	-204.328	1.04583	-157.63
1.05208	-200.19	1.05278	-154.14
1.05903	-195.679	1.05972	-150.173
1.06597	-191.075	1.06667	-146.171
1.07292	-186.36	1.07361	-141.984
1.07986	-181.751	1.08056	-137.487
1.08681	-176.536	1.0875	-132.705
1.09375	-171.569	1.09444	-128.076
1.10069	-166.031	1.10139	-122.998
1.10764	-160.178	1.10833	-118.108
1.11458	-154.454	1.11528	-112.838
1.12153	-149.291	1.12222	-107.178
1.12847	-144.005	1.12917	-101.091
1.13542	-137.588	1.13611	-95.522
1.14236	-131.322	1.14306	-89.7195
1.14931	-124.49	1.15	-83.8482
1.15625	-117.517	1.15694	-77.8139
1.16319	-110.677	1.16389	-72.3529
1.17014	-103.807	1.17083	-66.7823
1.17708	-96.6284	1.17778	-60.9082
1.18403	-89.3743	1.18472	-55.3875
1.19097	-82.0284	1.19167	-49.2955
1.19792	-74.0259	1.19861	-43.5665
1.20486	-66.2881	1.20556	-37.8778
1.21181	-57.9622	1.2125	-32.5852
1.21875	-50.5569	1.21944	-27.0929
1.22569	-43.0662	1.22639	-21.7324
1.23264	-35.6084	1.23333	-16.6601
1.23958	-28.5467	1.24028	-11.497
1.24653	-20.9466	1.24722	-6.00428
1.25347	-13.7674	1.25417	-0.689071
1.26042	-6.16744	1.26111	4.28369
1.26736	0.727942	1.26806	9.39067
1.27431	7.78898	1.275	13.6938
1.28125	13.9631	1.28194	18.5246
1.28819	21.0274	1.28889	22.7309
1.29514	27.9239	1.29583	26.4095
1.30208	35.0356	1.30278	30.5279
1.30903	41.7776	1.30972	33.9903
1.31597	47.3099	1.31667	37.8467
1.32292	53.917	1.32361	40.7129
1.32986	59.7259	1.33056	44.0674
1.33681	65.143	1.3375	47.1515
1.34375	69.5026	1.34444	50.2539
1.35069	74.351	1.35139	53.008
1.35764	78.5014	1.35833	55.8386
1.36458	82.6064	1.36528	58.1594
1.37153	85.6795	1.37222	60.1937
1.37847	88.2049	1.37917	62.453
1.38542	90.1622	1.38611	64.663
1.39236	92.8644	1.39306	66.2803
1.39931	95.5565	1.4	67.8565
1.40625	96.8159	1.40694	69.5928
1.41319	98.7675	1.41389	70.4264
1.42014	100.309	1.42083	71.3512
1.42708	101.539	1.42778	72.0672
1.43403	103.089	1.43472	73.05
1.44097	103.828	1.44167	73.7756
1.44792	105.094	1.44861	74.3866
1.45486	105.763	1.45556	75.0964
1.46181	106.072	1.4625	76.0472
1.46875	106.693	1.46944	76.4028
1.47569	105.798	1.47639	77.406
1.48264	105.711	1.48333	77.797
1.48958	105.588	1.49028	77.9457
1.49653	104.279	1.49722	77.712
1.50347	103.077	1.50417	77.289
1.51042	102.538	1.51111	76.8135
1.51736	100.726	1.51806	75.8186
1.52431	99.4836	1.525	75.0478
1.53125	97.102	1.53194	74.1719
1.53819	95.1498	1.53889	73.6141
1.54514	93.2097	1.54583	72.2733
1.55208	90.6574	1.55278	71.1499
1.55903	88.7869	1.55972	70.1226
1.56597	85.7777	1.56667	68.6444
1.57292	84.0506	1.57361	67.6524
1.57986	81.5311	1.58056	66.6474
1.58681	79.4301	1.5875	65.7811
1.59375	76.6393	1.59444	64.6666
1.60069	74.4281	1.60139	63.5375
1.60764	72.1621	1.60833	62.3149
1.61458	70.0436	1.61528	61.1489
1.62153	67.7435	1.62222	59.2208
1.62847	65.9148	1.62917	57.8424
1.63542	64.0289	1.63611	56.2741
1.64236	61.6478	1.64306	54.851
1.64931	60.1293	1.65	52.966
1.65625	57.5812	1.65694	51.6498
1.66319	55.4569	1.66389	50.472
1.67014	53.3891	1.67083	48.6513
1.67708	51.3917	1.67778	47.0563
1.68403	49.278	1.68472	45.7755
1.69097	46.8392	1.69167	44.4328
1.69792	44.8748	1.69861	42.9721
1.70486	42.8547	1.70556	41.8012
1.71181	40.8511	1.7125	40.4236
1.71875	38.4944	1.71944	39.3076
1.72569	36.04	1.72639	37.6809
1.73264	33.9273	1.73333	37.0179
1.73958	31.8505	1.74028	35.1013
1.74653	29.9894	1.74722	33.206
1.75347	27.6219	1.75417	32.1425
1.76042	25.1901	1.76111	30.1982
1.76736	22.3618	1.76806	28.7469
1.77431	20.6161	1.775	27.128
1.78125	18.1039	1.78194	25.1518
1.78819	16.2593	1.78889	23.4324
1.79514	13.5331	1.79583	21.5079
1.80208	11.4523	1.80278	19.261
1.80903	9.77225	1.80972	17.1269
1.81597	7.64385	1.81667	15.1834
1.82292	4.97444	1.82361	13.58
1.82986	2.89303	1.83056	11.778
1.83681	0.801005	1.8375	9.66779
1.84375	-1.30922	1.84444	7.79803
1.85069	-3.10566	1.85139	5.91624
1.85764	-5.67044	1.85833	4.03028
1.86458	-7.90496	1.86528	2.20609
1.87153	-9.90294	1.87222	0.137285
1.87847	-11.8955	1.87917	-1.41673
1.88542	-14.2351	1.88611	-3.48298
1.89236	-16.3798	1.89306	-5.03146
1.89931	-18.0656	1.9	-6.90371
1.90625	-19.0652	1.90694	-8.62616
1.91319	-20.5665	1.91389	-10.3154
1.92014	-21.9987	1.92083	-11.6677
1.92708	-23.5114	1.92778	-13.0251
1.93403	-24.4373	1.93472	-15.0636
1.94097	-25.6547	1.94167	-17.0967
1.94792	-26.5241	1.94861	-18.4524
1.95486	-28.2143	1.95556	-19.8851
1.96181	-29.2137	1.9625	-21.5809
1.96875	-30.2112	1.96944	-22.6423
1.97569	-31.3131	1.97639	-24.179
1.98264	-32.6874	1.98333	-25.5076
1.98958	-34.167	1.99028	-26.8472
1.99653	-35.077	1.99722	-28.1253
2.00347	-35.6526	2.00417	-29.6436
2.01042	-36.1049	2.01111	-30.7718
2.01736	-37.4339	2.01806	-31.5436
2.02431	-38.0576	2.025	-32.8141
2.03125	-39.1212	2.03194	-34.2978
2.03819	-39.3876	2.03889	-35.3274
2.04514	-39.5811	2.04583	-35.9906
2.05208	-39.346	2.05278	-37.0074
2.05903	-39.2496	2.05972	-37.729
2.06597	-38.9744	2.06667	-39.0528
2.07292	-38.5492	2.07361	-39.7205
2.07986	-38.6773	2.08056	-40.373
2.08681	-38.5441	2.0875	-40.6192
2.09375	-38.4526	2.09444	-41.0766
2.10069	-37.5669	2.10139	-41.6349
2.10764	-37.062	2.10833	-40.8608
2.11458	-35.7244	2.11528	-40.8392
2.12153	-34.657	2.12222	-40.8595
2.12847	-33.5212	2.12917	-41.1762
2.13542	-32.1288	2.13611	-40.9412
2.14236	-31.31	2.14306	-41.0042
2.14931	-30.1201	2.15	-40.2581
2.15625	-29.0352	2.15694	-39.6877
2.16319	-27.1756	2.16389	-39.0359
2.17014	-25.3332	2.17083	-39.1956
2.17708	-23.2181	2.17778	-38.7263
2.18403	-21.4714	2.18472	-37.9261
2.19097	-18.9824	2.19167	-37.8958
2.19792	-16.7109	2.19861	-37.007
2.20486	-15.6719	2.20556	-36.2071
2.21181	-14.0391	2.2125	-35.4509
2.21875	-12.381	2.21944	-34.6812
2.22569	-10.0155	2.22639	-33.5746
2.23264	-8.01718	2.23333	-32.624
2.23958	-5.89034	2.24028	-31.8767
2.24653	-3.84695	2.24722	-30.7256
2.25347	-2.19043	2.25417	-29.2329
2.26042	-0.724078	2.26111	-28.0262
2.26736	1.27236	2.26806	-26.6179
2.27431	3.43713	2.275	-25.031
2.28125	4.79204	2.28194	-23.7445
2.28819	7.43829	2.28889	-22.1212
2.29514	9.26014	2.29583	-20.3834
2.30208	11.1452	2.30278	-18.7948
2.30903	13.2259	2.30972	-17.317
2.31597	15.6942	2.31667	-15.7841
2.32292	17.7102	2.32361	-13.8289
2.32986	19.6111	2.33056	-12.6364
2.33681	21.8299	2.3375	-10.6195
2.34375	24.2004	2.34444	-8.83046
2.35069	26.3824	2.35139	-7.46525
2.35764	28.1675	2.35833	-5.81861
2.36458	30.3251	2.36528	-3.58879
2.37153	32.595	2.37222	-1.65493
2.37847	34.2651	2.37917	-0.172146
2.38542	35.9196	2.38611	1.44244
2.39236	37.424	2.39306	3.22499
2.39931	38.4186	2.4	5.30454
2.40625	39.9588	2.40694	6.49955
2.41319	40.989	2.41389	8.31749
2.42014	41.7003	2.42083	9.55021
2.42708	42.8057	2.42778	11.4675
2.43403	43.4586	2.43472	13.0915
2.44097	44.278	2.44167	14.4895
2.44792	44.4136	2.44861	15.7511
2.45486	44.5603	2.45556	16.6076
2.46181	45.1669	2.4625	18.3941
2.46875	45.6238	2.46944	19.9224
2.47569	45.9316	2.47639	21.5291
2.48264	46.4377	2.48333	22.7224
2.48958	46.9038	2.49028	24.2271
2.49653	47.5729	2.49722	25.4041
2.50347	48.4333	2.50417	26.6042
2.51042	48.3147	2.51111	27.3944
2.51736	48.1035	2.51806	28.657
2.52431	47.4421	2.525	29.7472
2.53125	47.981	2.53194	30.326
2.53819	47.5987	2.53889	31.4501
2.54514	47.4414	2.54583	31.9341
2.55208	47.0071	2.55278	32.2364
2.55903	46.3383	2.55972	32.6232
2.56597	45.6404	2.56667	32.9116
2.57292	44.5316	2.57361	33.3825
2.57986	43.3356	2.58056	33.5784
2.58681	41.7021	2.5875	34.1127
2.59375	40.9758	2.59444	34.598
2.60069	40.7448	2.60139	34.3729
2.60764	39.491	2.60833	34.3698
2.61458	38.4593	2.61528	34.6168
2.62153	36.8432	2.62222	34.8232
2.62847	35.5584	2.62917	35.268
2.63542	34.7348	2.63611	35.4834
2.64236	33.6221	2.64306	35.6261
2.64931	32.1428	2.65	35.8408
2.65625	30.329	2.65694	35.9101
2.66319	28.7534	2.66389	35.7532
2.67014	28.0149	2.67083	35.1143
2.67708	26.4591	2.67778	34.8651
2.68403	24.7224	2.68472	34.8489
2.69097	23.2128	2.69167	34.5723
2.69792	21.2426	2.69861	34.1225
2.70486	20.0626	2.70556	33.4864
2.71181	18.5231	2.7125	32.5199
2.71875	16.1376	2.71944	32.0594
2.72569	14.4814	2.72639	31.243
2.73264	12.8908	2.73333	30.3989
2.73958	11.4521	2.74028	29.2659
2.74653	9.64062	2.74722	29.004
2.75347	7.28498	2.75417	28.3697
2.76042	5.07512	2.76111	27.1564
2.76736	2.90554	2.76806	26.6015
2.77431	1.02934	2.775	25.3485
2.78125	-0.414864	2.78194	24.1451
2.78819	-2.44921	2.78889	22.939
2.79514	-4.30398	2.79583	21.6114
2.80208	-5.99479	2.80278	20.4772
2.80903	-8.06179	2.80972	19.3876
2.81597	-10.398	2.81667	18.0808
2.82292	-12.6432	2.82361	16.7756
2.82986	-14.0698	2.83056	15.2544
2.83681	-15.5956	2.8375	13.8945
2.84375	-16.9978	2.84444	12.3072
2.85069	-19.1977	2.85139	10.1448
2.85764	-20.8115	2.85833	8.85113
2.86458	-22.3823	2.86528	7.5008
2.87153	-23.6897	2.87222	6.19646
2.87847	-25.7155	2.87917	4.91477
2.88542	-27.3373	2.88611	3.31589
2.89236	-28.4086	2.89306	1.64841
2.89931	-29.5945	2.9	0.356632
2.90625	-30.6357	2.90694	-1.18585
2.91319	-32.0639	2.91389	-2.36111
2.92014	-33.4839	2.92083	-3.59988
2.92708	-34.4983	2.92778	-5.11062
2.93403	-35.7635	2.93472	-6.25961
2.94097	-37.1421	2.94167	-7.63013
2.94792	-39.2694	2.94861	-8.38042
2.95486	-40.2552	2.95556	-9.93993
2.96181	-40.622	2.9625	-11.1777
2.96875	-41.7685	2.96944	-12.5605
2.97569	-43.0308	2.97639	-13.5091
2.98264	-43.906	2.98333	-14.7541
2.98958	-45.1358	2.99028	-15.6781
2.99653	-46.0147	2.99722	-17.2837
3.00347	-46.3592	3.00417	-18.6256
3.01042	-47.1238	3.01111	-19.6907
3.01736	-47.2604	3.01806	-20.8756
3.02431	-47.4608	3.025	-22.0539
3.03125	-47.5377	3.03194	-23.6217
3.03819	-48.0803	3.03889	-24.6993
3.04514	-48.7623	3.04583	-25.5211
3.05208	-48.9851	3.05278	-26.5436
3.05903	-49.1221	3.05972	-28.1837
3.06597	-49.4688	3.06667	-29.381
3.07292	-49.1015	3.07361	-30.7936
3.07986	-49.4985	3.08056	-31.8723
3.08681	-50.385	3.0875	-32.8688
3.09375	-50.6157	3.09444	-33.2667
3.10069	-50.5444	3.10139	-33.9983
3.10764	-50.4889	3.10833	-34.952
3.11458	-50.3798	3.11528	-35.7243
3.12153	-50.315	3.12222	-36.1237
3.12847	-50.1146	3.12917	-36.6847
3.13542	-49.6886	3.13611	-37.3893
3.14236	-49.6215	3.14306	-37.594
3.14931	-48.9009	3.15	-38.1349
3.15625	-48.2477	3.15694	-38.3279
3.16319	-47.6058	3.16389	-38.7588
3.17014	-46.8724	3.17083	-39.2302
3.17708	-46.5052	3.17778	-39.5073
3.18403	-45.9207	3.18472	-40.0113
3.19097	-44.9452	3.19167	-39.9934
3.19792	-43.8907	3.19861	-39.9605
3.20486	-42.814	3.20556	-39.9503
3.21181	-41.8555	3.2125	-40.3691
3.21875	-40.5796	3.21944	-40.2313
3.22569	-39.0112	3.22639	-40.0746
3.23264	-37.9195	3.23333	-39.9799
3.23958	-36.7659	3.24028	-39.5633
3.24653	-35.2389	3.24722	-39.1646
3.25347	-33.6152	3.25417	-38.8878
3.26042	-31.8362	3.26111	-38.6019
3.26736	-30.3921	3.26806	-37.6494
3.27431	-28.7949	3.275	-36.9262
3.28125	-27.0112	3.28194	-36.5911
3.28819	-24.8068	3.28889	-36.2532
3.29514	-23.161	3.29583	-35.4626
3.30208	-21.5755	3.30278	-34.6478
3.30903	-19.5638	3.30972	-33.8903
3.31597	-17.6794	3.31667	-32.6642
3.32292	-15.7936	3.32361	-32.0209
3.32986	-13.5805	3.33056	-31.0502
3.33681	-11.599	3.3375	-29.8894
3.34375	-9.93297	3.34444	-29.3729
3.35069	-7.88059	3.35139	-28.3173
3.35764	-5.93587	3.35833	-27.445
3.36458	-4.0511	3.36528	-25.8947
3.37153	-2.60967	3.37222	-24.8794
3.37847	-0.775063	3.37917	-23.8527
3.38542	0.85708	3.38611	-22.5494
3.39236	2.43641	3.39306	-21.2117
3.39931	4.39387	3.4	-19.7766
3.40625	5.73028	3.40694	-18.0328
3.41319	7.28835	3.41389	-16.2958
3.42014	8.68211	3.42083	-14.5971
3.42708	10.7136	3.42778	-12.9107
3.43403	12.0672	3.43472	-11.3654
3.44097	13.278	3.44167	-9.63339
3.44792	14.3389	3.44861	-8.65882
3.45486	15.9731	3.45556	-7.10062
3.46181	17.5645	3.4625	-5.62892
3.46875	18.8739	3.46944	-4.52079
3.47569	19.5818	3.47639	-3.05534
3.48264	20.0182	3.48333	-1.61489
3.48958	21.3802	3.49028	-0.110265
3.49653	22.1739	3.49722	1.30442
3.50347	23.4372	3.50417	2.62246
3.51042	24.6464	3.51111	4.47542
3.51736	25.8037	3.51806	5.47405
3.52431	26.9181	3.525	6.90118
3.53125	28.2502	3.53194	8.7787
3.53819	29.0454	3.53889	10.2422
3.54514	29.8816	3.54583	11.6059
3.55208	30.795	3.55278	13.2415
3.55903	31.6682	3.55972	14.4911
3.56597	33.2077	3.56667	15.2512
3.57292	33.8538	3.57361	16.1391
3.57986	34.8568	3.58056	16.7089
3.58681	35.4401	3.5875	17.7245
3.59375	35.4187	3.59444	18.6324
3.60069	35.9352	3.60139	19.6876
3.60764	36.261	3.60833	20.4054
3.61458	36.4177	3.61528	21.1076
3.62153	36.1501	3.62222	21.9282
3.62847	36.6238	3.62917	23.0339
3.63542	36.9514	3.63611	23.5662
3.64236	37.2762	3.64306	24.4686
3.64931	36.9485	3.65	25.0649
3.65625	36.2271	3.65694	25.5018
3.66319	36.125	3.66389	26.0602
3.67014	36.1092	3.67083	26.864
3.67708	36.383	3.67778	27.2985
3.68403	36.269	3.68472	27.557
3.69097	36.0486	3.69167	27.9285
3.69792	35.7036	3.69861	27.8313
3.70486	34.9585	3.70556	27.8738
3.71181	34.104	3.7125	27.7131
3.71875	33.1236	3.71944	28.0501
3.72569	32.3121	3.72639	27.8619
3.73264	31.5164	3.73333	28.2175
3.73958	31.7388	3.74028	28.576
3.74653	30.4317	3.74722	29.2534
3.75347	28.764	3.75417	29.0247
3.76042	27.3828	3.76111	29.1232
3.76736	25.6734	3.76806	29.3275
3.77431	24.2869	3.775	29.2699
3.78125	22.6642	3.78194	29.4386
3.78819	21.7787	3.78889	29.4672
3.79514	20.907	3.79583	29.9758
3.80208	19.6473	3.80278	29.8479
3.80903	18.1652	3.80972	29.9515
3.81597	16.6989	3.81667	29.7244
3.82292	15.1629	3.82361	29.2174
3.82986	13.9229	3.83056	28.4561
3.83681	12.7052	3.8375	27.7609
3.84375	10.9748	3.84444	27.133
3.85069	9.70396	3.85139	26.5935
3.85764	8.20803	3.85833	25.9795
3.86458	6.66709	3.86528	25.1631
3.87153	5.53575	3.87222	24.313
3.87847	3.29654	3.87917	23.1545
3.88542	1.59199	3.88611	22.0288
3.89236	0.538329	3.89306	20.8274
3.89931	-0.921973	3.9	19.717
3.90625	-2.97063	3.90694	18.5763
3.91319	-4.87318	3.91389	17.8145
3.92014	-6.34573	3.92083	16.8863
3.92708	-7.6722	3.92778	15.2298
3.93403	-9.17807	3.93472	14.0713
3.94097	-10.992	3.94167	12.7911
3.94792	-12.4749	3.94861	11.8548
3.95486	-14.3518	3.95556	10.9351
3.96181	-15.8161	3.9625	9.87373
3.96875	-17.407	3.96944	9.13673
3.97569	-19.2572	3.97639	8.03124
3.98264	-21.0558	3.98333	6.7556
3.98958	-22.3295	3.99028	5.87961
3.99653	-23.5528	3.99722	4.66809
4.00347	-24.9484	4.00417	3.61576
4.01042	-26.3167	4.01111	2.95298
4.01736	-28.0213	4.01806	2.11397
4.02431	-29.2719	4.025	1.2469
4.03125	-30.3816	4.03194	-0.0117569
4.03819	-31.5068	4.03889	-1.17754
4.04514	-32.5776	4.04583	-2.42155
4.05208	-33.069	4.05278	-3.78144
4.05903	-34.0917	4.05972	-4.5962
4.06597	-34.5636	4.06667	-5.57671
4.07292	-35.8547	4.07361	-6.66425
4.07986	-37.0198	4.08056	-7.95162
4.08681	-37.6936	4.0875	-9.09507
4.09375	-38.4665	4.09444	-10.3495
4.10069	-38.7232	4.10139	-11.6298
4.10764	-39.0102	4.10833	-12.8261
4.11458	-39.7601	4.11528	-13.7256
4.12153	-40.1516	4.12222	-14.7059
4.12847	-40.5252	4.12917	-15.666
4.13542	-41.1808	4.13611	-16.4237
4.14236	-41.2921	4.14306	-17.6742
4.14931	-41.5255	4.15	-18.479
4.15625	-41.3156	4.15694	-19.481
4.16319	-41.1298	4.16389	-20.4968
4.17014	-41.2741	4.17083	-21.0739
4.17708	-40.8544	4.17778	-21.5796
4.18403	-40.8928	4.18472	-22.2291
4.19097	-40.5605	4.19167	-22.6613
4.19792	-39.5879	4.19861	-23.2805
4.20486	-39.2783	4.20556	-23.9429
4.21181	-38.9464	4.2125	-24.5272
4.21875	-38.0895	4.21944	-25.2519
4.22569	-37.4683	4.22639	-25.2781
4.23264	-36.8918	4.23333	-25.7768
4.23958	-36.0904	4.24028	-25.9701
4.24653	-34.5137	4.24722	-25.9894
4.25347	-33.1284	4.25417	-26.4239
4.26042	-32.4678	4.26111	-26.7414
4.26736	-30.9105	4.26806	-27.1969
4.27431	-30.0008	4.275	-27.3923
4.28125	-29.4784	4.28194	-27.3849
4.28819	-28.1808	4.28889	-27.2933
4.29514	-26.4237	4.29583	-27.2812
4.30208	-25.3877	4.30278	-26.8706
4.30903	-24.0471	4.30972	-27.2207
4.31597	-22.5558	4.31667	-26.918
4.32292	-21.0172	4.32361	-26.8486
4.32986	-20.1703	4.33056	-26.77
4.33681	-18.8728	4.3375	-26.3191
4.34375	-17.1444	4.34444	-26.1059
4.35069	-15.8579	4.35139	-25.6388
4.35764	-13.7433	4.35833	-25.5079
4.36458	-11.7852	4.36528	-25.355
4.37153	-9.84471	4.37222	-24.712
4.37847	-8.48737	4.37917	-24.329
4.38542	-6.43625	4.38611	-23.7945
4.39236	-4.47061	4.39306	-23.1972
4.39931	-2.53856	4.4	-22.4667
4.40625	-0.518454	4.40694	-21.9236
4.41319	1.02408	4.41389	-21.3092
4.42014	2.5417	4.42083	-20.6421
4.42708	4.38941	4.42778	-20.1604
4.43403	6.29516	4.43472	-19.319
4.44097	7.88483	4.44167	-18.4088
4.44792	9.27744	4.44861	-17.4345
4.45486	10.7638	4.45556	-16.9946
4.46181	12.5887	4.4625	-16.3924
4.46875	13.8407	4.46944	-15.9918
4.47569	15.4396	4.47639	-15.2945
4.48264	17.1609	4.48333	-14.6346
4.48958	18.3331	4.49028	-13.5222
4.49653	20.1976	4.49722	-12.4154
4.50347	22.1887	4.50417	-11.6841
4.51042	23.5405	4.51111	-10.5008
4.51736	24.9085	4.51806	-9.801
4.52431	25.8706	4.525	-9.09012
4.53125	27.5557	4.53194	-8.22686
4.53819	28.8378	4.53889	-7.07764
4.54514	29.8708	4.54583	-5.85086
4.55208	31.1549	4.55278	-4.6722
4.55903	32.0461	4.55972	-3.30411
4.56597	32.5154	4.56667	-2.40177
4.57292	33.3394	4.57361	-1.53666
4.57986	34.3643	4.58056	-0.866071
4.58681	34.7597	4.5875	0.249725
4.59375	35.2456	4.59444	1.36873
4.60069	35.3195	4.60139	2.41186
4.60764	35.8895	4.60833	3.68929
4.61458	35.9531	4.61528	4.52766
4.62153	36.0047	4.62222	5.08146
4.62847	36.309	4.62917	6.34615
4.63542	36.5867	4.63611	7.19178
4.64236	36.5841	4.64306	7.70511
4.64931	36.6098	4.65	8.36506
4.65625	36.8334	4.65694	9.09395
4.66319	36.316	4.66389	10.0964
4.67014	36.0043	4.67083	10.5929
4.67708	35.5767	4.67778	11.497
4.68403	35.752	4.68472	12.2562
4.69097	35.158	4.69167	12.6779
4.69792	34.8383	4.69861	13.1934
4.70486	34.5982	4.70556	14.0048
4.71181	33.825	4.7125	14.2992
4.71875	32.8081	4.71944	15.2012
4.72569	32.1147	4.72639	15.9688
4.73264	31.4765	4.73333	16.409
4.73958	30.4027	4.74028	16.8335
4.74653	29.8025	4.74722	17.4063
4.75347	29.1266	4.75417	17.9336
4.76042	27.8226	4.76111	18.1235
4.76736	26.7385	4.76806	18.7767
4.77431	25.8271	4.775	19.1094
4.78125	24.419	4.78194	19.8209
4.78819	23.6305	4.78889	20.2508
4.79514	23.1914	4.79583	20.7763
4.80208	22.1268	4.80278	20.4914
4.80903	21.0989	4.80972	20.8582
4.81597	19.8851	4.81667	21.3536
4.82292	18.773	4.82361	21.8425
4.82986	17.03	4.83056	22.2079
4.83681	15.5575	4.8375	22.1026
4.84375	14.5017	4.84444	22.2756
4.85069	12.7366	4.85139	22.2959
4.85764	11.5574	4.85833	22.223
4.86458	10.4364	4.86528	22.1478
4.87153	8.82104	4.87222	22.3312
4.87847	7.37763	4.87917	22.0392
4.88542	6.08162	4.88611	22.4088
4.89236	4.39753	4.89306	22.0126
4.89931	2.66107	4.9	22.0386
4.90625	1.2246	4.90694	21.5217
4.91319	-0.49437	4.91389	20.7436
4.92014	-2.20284	4.92083	20.8052
4.92708	-3.63673	4.92778	20.6413
4.93403	-5.12108	4.93472	20.217
4.94097	-6.26014	4.94167	20.4098
4.94792	-7.44103	4.94861	19.6327
4.95486	-9.31301	4.95556	19.1368
4.96181	-11.3436	4.9625	18.8061
4.96875	-12.9806	4.96944	17.8854
4.97569	-14.3654	4.97639	17.1858
4.98264	-15.6894	4.98333	16.5261
4.98958	-17.351	4.99028	16.017
4.99653	-18.6358	4.99722	15.6139
5.00347	-19.6525	5.00417	14.7836
5.01042	-21.0602	5.01111	13.8959
5.01736	-22.31	5.01806	13.2182
5.02431	-23.883	5.025	12.184
5.03125	-25.2017	5.03194	12.116
5.03819	-26.0554	5.03889	11.1406
5.04514	-27.5403	5.04583	10.6885
5.05208	-28.5071	5.05278	10.2803
5.05903	-29.8166	5.05972	10.0921
5.06597	-30.7514	5.06667	9.3653
5.07292	-31.6639	5.07361	8.73521
5.07986	-32.3051	5.08056	8.01293
5.08681	-33.605	5.0875	7.32457
5.09375	-34.2584	5.09444	6.38588
5.10069	-34.9731	5.10139	5.32872
5.10764	-35.6743	5.10833	5.03781
5.11458	-36.4406	5.11528	4.26536
5.12153	-37.3829	5.12222	4.20163
5.12847	-37.5244	5.12917	3.26403
5.13542	-37.5935	5.13611	2.51687
5.14236	-37.6019	5.14306	1.48112
5.14931	-37.7359	5.15	0.904579
5.15625	-37.6924	5.15694	0.392278
5.16319	-37.7964	5.16389	-0.0789722
5.17014	-37.3697	5.17083	-1.18453
5.17708	-37.2704	5.17778	-1.80584
5.18403	-37.0565	5.18472	-1.90341
5.19097	-37.3194	5.19167	-2.97304
5.19792	-37.1223	5.19861	-3.80192
5.20486	-36.9304	5.20556	-5.0866
5.21181	-36.4021	5.2125	-5.67819
5.21875	-36.2234	5.21944	-6.3391
5.22569	-35.7565	5.22639	-7.05967
5.23264	-35.5203	5.23333	-7.5319
5.23958	-35.1644	5.24028	-8.34809
5.24653	-34.8669	5.24722	-9.36245
5.25347	-34.1262	5.25417	-9.48147
5.26042	-33.4089	5.26111	-9.92496
5.26736	-32.4952	5.26806	-10.5609
5.27431	-31.7242	5.275	-10.8815
5.28125	-30.7869	5.28194	-11.496
5.28819	-29.6813	5.28889	-11.8468
5.29514	-28.8619	5.29583	-12.7199
5.30208	-28.3657	5.30278	-13.1493
5.30903	-27.634	5.30972	-13.3888
5.31597	-26.3603	5.31667	-14.0502
5.32292	-24.6889	5.32361	-14.4652
5.32986	-22.9885	5.33056	-14.5797
5.33681	-21.7666	5.3375	-14.855
5.34375	-20.2759	5.34444	-14.7679
5.35069	-19.2275	5.35139	-15.405
5.35764	-17.6152	5.35833	-15.5092
5.36458	-15.907	5.36528	-15.7632
5.37153	-14.0637	5.37222	-16.0947
5.37847	-12.3087	5.37917	-16.3051
5.38542	-9.97416	5.38611	-16.6815
5.39236	-7.97004	5.39306	-16.8742
5.39931	-6.23679	5.4	-17.0486
5.40625	-4.6208	5.40694	-17.1657
5.41319	-2.54262	5.41389	-17.5842
5.42014	-0.459975	5.42083	-17.3499
5.42708	1.90039	5.42778	-17.694
5.43403	4.10545	5.43472	-17.7346
5.44097	6.29834	5.44167	-17.7151
5.44792	8.21819	5.44861	-17.7277
5.45486	10.3367	5.45556	-17.1847
5.46181	12.2519	5.4625	-16.6986
5.46875	13.7703	5.46944	-15.9969
5.47569	15.7199	5.47639	-15.8521
5.48264	18.3224	5.48333	-15.2054
5.48958	20.2584	5.49028	-14.5446
5.49653	21.7654	5.49722	-13.3749
5.50347	23.386	5.50417	-13.0365
5.51042	24.5266	5.51111	-12.6301
5.51736	26.4373	5.51806	-12.1375
5.52431	28.212	5.525	-11.7198
5.53125	29.3454	5.53194	-10.7704
5.53819	30.5189	5.53889	-10.6288
5.54514	31.8656	5.54583	-9.77257
5.55208	33.7502	5.55278	-9.24755
5.55903	34.9427	5.55972	-8.23843
5.56597	35.4445	5.56667	-7.95021
5.57292	36.2199	5.57361	-7.53235
5.57986	37.6676	5.58056	-7.23755
5.58681	38.5366	5.5875	-6.51193
5.59375	39.7533	5.59444	-5.66587
5.60069	40.4988	5.60139	-4.76685
5.60764	41.2534	5.60833	-4.25759
5.61458	42.4635	5.61528	-4.23416
5.62153	43.1211	5.62222	-3.44233
5.62847	44.0148	5.62917	-3.00013
5.63542	44.003	5.63611	-2.71356
5.64236	44.3332	5.64306	-2.43532
5.64931	44.8918	5.65	-1.66979
5.65625	45.5375	5.65694	-1.31777
5.66319	45.7053	5.66389	-0.624201
5.67014	45.7528	5.67083	-0.225906
5.67708	45.1656	5.67778	0.160352
5.68403	44.9837	5.68472	0.747109
5.69097	44.9395	5.69167	0.919139
5.69792	45.1891	5.69861	1.77139
5.70486	44.87	5.70556	2.19588
5.71181	44.1935	5.7125	2.46186
5.71875	43.8848	5.71944	2.63781
5.72569	43.5921	5.72639	3.2572
5.73264	43.1788	5.73333	3.31106
5.73958	42.4461	5.74028	3.69403
5.74653	41.5696	5.74722	3.61482
5.75347	41.0943	5.75417	4.16755
5.76042	40.7017	5.76111	4.45633
5.76736	40.1399	5.76806	4.82678
5.77431	39.4359	5.775	5.59896
5.78125	38.1146	5.78194	6.10394
5.78819	37.4475	5.78889	6.42704
5.79514	36.6663	5.79583	6.84445
5.80208	36.1083	5.80278	7.53722
5.80903	34.7766	5.80972	7.6339
5.81597	33.4876	5.81667	8.25209
5.82292	32.7842	5.82361	8.64568
5.82986	31.68	5.83056	9.24531
5.83681	30.5488	5.8375	9.10473
5.84375	29.3782	5.84444	9.53357
5.85069	28.1441	5.85139	9.36462
5.85764	26.8587	5.85833	9.29002
5.86458	25.7261	5.86528	9.40341
5.87153	23.8408	5.87222	9.86587
5.87847	22.4842	5.87917	10.2086
5.88542	20.3401	5.88611	10.2527
5.89236	19.0203	5.89306	10.111
5.89931	17.7028	5.9	10.1567
5.90625	15.6773	5.90694	10.385
5.91319	13.9124	5.91389	10.5117
5.92014	12.0111	5.92083	10.6364
5.92708	10.0059	5.92778	10.7155
5.93403	7.96208	5.93472	11.0316
5.94097	5.75215	5.94167	11.0121
5.94792	3.837	5.94861	10.682
5.95486	2.80596	5.95556	10.3855
5.96181	0.996054	5.9625	9.91341
5.96875	-0.385977	5.96944	9.89003
5.97569	-1.84568	5.97639	10.1454
5.98264	-3.59034	5.98333	10.1532
5.98958	-5.38675	5.99028	9.98375
5.99653	-7.24482	5.99722	9.55664
6.00347	-9.22484	6.00417	9.25239
6.01042	-10.5887	6.01111	8.87491
6.01736	-11.7752	6.01806	8.94756
6.02431	-13.6925	6.025	8.96502
6.03125	-15.2254	6.03194	8.91516
6.03819	-16.9908	6.03889	8.81167
6.04514	-18.6623	6.04583	8.54524
6.05208	-20.289	6.05278	7.99971
6.05903	-21.7984	6.05972	7.7675
6.06597	-23.5469	6.06667	7.23665
6.07292	-24.7794	6.07361	7.01955
6.07986	-25.8544	6.08056	7.01358
6.08681	-26.5627	6.0875	7.01007
6.09375	-27.7725	6.09444	6.76835
6.10069	-29.4226	6.10139	5.95394
6.10764	-30.3955	6.10833	5.64697
6.11458	-31.9064	6.11528	5.36592
6.12153	-32.9554	6.12222	4.9839
6.12847	-34.289	6.12917	4.86263
6.13542	-34.8787	6.13611	4.85343
6.14236	-35.9202	6.14306	4.5469
6.14931	-36.5678	6.15	4.32877
6.15625	-37.481	6.15694	4.01399
6.16319	-38.2076	6.16389	3.45564
6.17014	-39.1676	6.17083	3.14043
6.17708	-39.7767	6.17778	2.75673
6.18403	-39.8861	6.18472	2.41029
6.19097	-40.5063	6.19167	2.08381
6.19792	-40.5822	6.19861	1.97719
6.20486	-40.8641	6.20556	1.675
6.21181	-40.204	6.2125	1.54072
6.21875	-40.3883	6.21944	1.43069
6.22569	-40.1607	6.22639	1.05174
6.23264	-40.0633	6.23333	0.808054
6.23958	-39.8675	6.24028	0.594657
6.24653	-39.4736	6.24722	0.760351
6.25347	-38.9482	6.25417	0.33259
6.26042	-38.3661	6.26111	0.331091
6.26736	-37.7534	6.26806	0.218294
6.27431	-36.4658	6.275	-0.250639
6.28125	-36.0725	6.28194	-0.840793
6.28819	-35.5686	6.28889	-1.10577
6.29514	-34.8978	6.29583	-1.38861
6.30208	-33.8325	6.30278	-1.74231
6.30903	-32.9821	6.30972	-2.08873
6.31597	-31.8706	6.31667	-2.284
6.32292	-30.7629	6.32361	-2.54881
6.32986	-30.1435	6.33056	-2.91106
6.33681	-29.325	6.3375	-2.95512
6.34375	-28.6195	6.34444	-3.41424
6.35069	-27.7829	6.35139	-3.39656
6.35764	-26.6585	6.35833	-3.37901
6.36458	-24.9939	6.36528	-2.94355
6.37153	-23.6417	6.37222	-2.8234
6.37847	-22.7287	6.37917	-2.95937
6.38542	-21.6527	6.38611	-3.10774
6.39236	-20.5468	6.39306	-3.31594
6.39931	-19.3554	6.4	-3.54557
6.40625	-18.2912	6.40694	-3.69342
6.41319	-16.514	6.41389	-3.6658
6.42014	-14.8395	6.42083	-3.80335
6.42708	-12.6883	6.42778	-3.90553
6.43403	-10.8405	6.43472	-3.8192
6.44097	-9.24544	6.44167	-3.56868
6.44792	-7.69581	6.44861	-3.89167
6.45486	-5.93723	6.45556	-4.07272
6.46181	-3.69097	6.4625	-4.01652
6.46875	-1.96167	6.46944	-3.60652
6.47569	-0.0376047	6.47639	-3.69421
6.48264	1.77897	6.48333	-3.42
6.48958	3.90066	6.49028	-3.44126
6.49653	5.79716	6.49722	-3.60455
6.50347	7.63497	6.50417	-3.56824
6.51042	9.00733	6.51111	-3.08634
6.51736	10.6067	6.51806	-3.23892
6.52431	12.6521	6.525	-2.989
6.53125	13.9821	6.53194	-2.9688
6.53819	15.264	6.53889	-3.04726
6.54514	16.3862	6.54583	-2.8418
6.55208	17.6818	6.55278	-2.8987
6.55903	19.2832	6.55972	-2.4759
6.56597	20.7297	6.56667	-2.63272
6.57292	21.9943	6.57361	-2.28456
6.57986	23.0558	6.58056	-1.90148
6.58681	24.0239	6.5875	-1.82674
6.59375	25.3611	6.59444	-1.88169
6.60069	26.5396	6.60139	-1.88647
6.60764	27.3016	6.60833	-1.97766
6.61458	28.6765	6.61528	-1.73421
6.62153	30.0108	6.62222	-1.53574
6.62847	31.155	6.62917	-1.80019
6.63542	32.0181	6.63611	-1.64842
6.64236	32.5788	6.64306	-1.38217
6.64931	33.3395	6.65	-1.45388
6.65625	34.2661	6.65694	-1.32066
6.66319	34.6666	6.66389	-1.34965
6.67014	35.437	6.67083	-1.24696
6.67708	36.1056	6.67778	-1.12043
6.68403	36.3339	6.68472	-0.585377
6.69097	36.7092	6.69167	-0.607137
6.69792	36.7214	6.69861	-0.492055
6.70486	36.8946	6.70556	-0.482625
6.71181	36.7937	6.7125	-0.360981
6.71875	37.2132	6.71944	-0.467297
6.72569	37.3418	6.72639	-0.208627
6.73264	37.2922	6.73333	-0.110027
6.73958	37.4159	6.74028	0.0208663
6.74653	37.6423	6.74722	0.229821
6.75347	37.6353	6.75417	0.38089
6.76042	37.2774	6.76111	0.829407
6.76736	37.4865	6.76806	0.615568
6.77431	37.419	6.775	0.716388
6.78125	37.5699	6.78194	0.741571
6.78819	37.3604	6.78889	0.766722
6.79514	36.8123	6.79583	1.14922
6.80208	36.3159	6.80278	1.10775
6.80903	35.8888	6.80972	0.793614
6.81597	35.5217	6.81667	1.63323
6.82292	34.775	6.82361	1.46337
6.82986	34.577	6.83056	1.3408
6.83681	33.8238	6.8375	1.48833
6.84375	32.9455	6.84444	1.20703
6.85069	32.0193	6.85139	1.31116
6.85764	30.9368	6.85833	1.32228
6.86458	29.7845	6.86528	1.63334
6.87153	29.1335	6.87222	2.23157
6.87847	28.4596	6.87917	2.02137
6.88542	27.1729	6.88611	2.07102
6.89236	25.9979	6.89306	2.22232
6.89931	24.4696	6.9	1.9862
6.90625	23.1042	6.90694	2.22367
6.91319	21.3347	6.91389	2.51631
6.92014	20.1801	6.92083	2.49696
6.92708	19.0036	6.92778	2.61643
6.93403	17.444	6.93472	2.54529
6.94097	16.1292	6.94167	2.5504
6.94792	15.1321	6.94861	2.3477
6.95486	13.0967	6.95556	2.00657
6.96181	11.6725	6.9625	2.34604
6.96875	10.2454	6.96944	2.71176
6.97569	8.75808	6.97639	2.77695
6.98264	7.50423	6.98333	2.55136
6.98958	6.19204	6.99028	2.56834
6.99653	4.88065	6.99722	2.5116
7.00347	2.89344	7.00417	2.46112
7.01042	0.944759	7.01111	2.14853
7.01736	-0.65112	7.01806	2.26522
7.02431	-2.20613	7.025	2.0954
7.03125	-4.4878	7.03194	2.0765
7.03819	-5.72319	7.03889	2.12591
7.04514	-7.60108	7.04583	1.70724
7.05208	-9.07995	7.05278	1.33285
7.05903	-10.2447	7.05972	1.36737
7.06597	-11.6085	7.06667	1.22856
7.07292	-13.442	7.07361	0.992445
7.07986	-15.3392	7.08056	0.813059
7.08681	-16.5441	7.0875	0.9059
7.09375	-17.7195	7.09444	1.08
7.10069	-19.0997	7.10139	0.679221
7.10764	-20.6425	7.10833	0.650755
7.11458	-22.0646	7.11528	0.737604
7.12153	-23.4974	7.12222	0.604838
7.12847	-24.8327	7.12917	1.0506
7.13542	-26.1542	7.13611	1.15729
7.14236	-27.6616	7.14306	0.820649
7.14931	-29.1651	7.15	0.819981
7.15625	-30.2306	7.15694	0.869871
7.16319	-30.8274	7.16389	0.496913
7.17014	-31.9969	7.17083	0.332308
7.17708	-32.8057	7.17778	0.0847031
7.18403	-33.3767	7.18472	-0.0137919
7.19097	-33.9528	7.19167	-0.132806
7.19792	-34.2603	7.19861	-0.563054
7.20486	-34.8183	7.20556	-0.87016
7.21181	-35.0763	7.2125	-1.47154
7.21875	-35.7372	7.21944	-1.96783
7.22569	-36.2659	7.22639	-2.43878
7.23264	-36.5651	7.23333	-2.89927
7.23958	-36.6679	7.24028	-3.22737
7.24653	-36.9198	7.24722	-3.08076
7.25347	-36.762	7.25417	-3.77816
7.26042	-36.8229	7.26111	-4.0333
7.26736	-36.7133	7.26806	-4.08768
7.27431	-36.5713	7.275	-4.24139
7.28125	-36.1574	7.28194	-4.73017
7.28819	-36.0652	7.28889	-4.91274
7.29514	-36.103	7.29583	-5.23747
7.30208	-35.3084	7.30278	-5.30676
7.30903	-34.5731	7.30972	-5.17938
7.31597	-33.9022	7.31667	-5.37247
7.32292	-33.1575	7.32361	-5.83734
7.32986	-32.798	7.33056	-6.38508
7.33681	-31.9241	7.3375	-6.32182
7.34375	-31.2571	7.34444	-6.63146
7.35069	-30.5675	7.35139	-6.89646
7.35764	-29.7035	7.35833	-7.13568
7.36458	-29.004	7.36528	-7.31772
7.37153	-27.7225	7.37222	-7.38386
7.37847	-26.037	7.37917	-7.28181
7.38542	-24.9229	7.38611	-7.56869
7.39236	-23.885	7.39306	-7.81283
7.39931	-22.3544	7.4	-7.72379
7.40625	-21.2956	7.40694	-7.87626
7.41319	-19.7802	7.41389	-7.88799
7.42014	-18.3655	7.42083	-7.85107
7.42708	-16.6835	7.42778	-7.53343
7.43403	-15.3417	7.43472	-7.66639
7.44097	-14.5215	7.44167	-7.77076
7.44792	-13.1989	7.44861	-7.65149
7.45486	-12.5895	7.45556	-7.76632
7.46181	-12.108	7.4625	-7.98638
7.46875	-11.4878	7.46944	-7.97606
7.47569	-10.7423	7.47639	-7.81184
7.48264	-10.4529	7.48333	-7.80999
7.48958	-9.72251	7.49028	-7.52749

## Sheet: 4b.HP biolum
Misaligned feeding impairs memories. Loh et al. 2015
Source data for Figure 4b.
Hippocampus representative trace
ALIGNED		MISALIGNED
ZT	Baseline-subtracted bioluminescence	ZT	Baseline-subtracted bioluminescence
0.57153	110.782	0.57361	12.1785
0.57847	95.2981	0.58056	-5.89001
0.58542	83.2731	0.5875	-19.4388
0.59236	73.6357	0.59444	-28.4816
0.59931	65.5867	0.60139	-34.4263
0.60625	58.9268	0.60833	-38.0747
0.61319	53.6809	0.61528	-40.1187
0.62014	48.6613	0.62222	-40.0904
0.62708	42.5359	0.62917	-38.9349
0.63403	36.2191	0.63611	-36.4628
0.64097	29.444	0.64306	-33.7092
0.64792	21.3819	0.65	-30.6372
0.65486	13.6149	0.65694	-27.3963
0.66181	10.5549	0.66389	-24.2118
0.66875	1.76981	0.67083	-20.0458
0.67569	-7.12918	0.67778	-16.2592
0.68264	-16.1973	0.68472	-12.1898
0.68958	-24.6003	0.69167	-8.10592
0.69653	-33.0883	0.69861	-2.86739
0.70347	-40.7164	0.70556	1.65943
0.71042	-46.9989	0.7125	6.3256
0.71736	-51.3286	0.71944	11.1953
0.72431	-55.0763	0.72639	16.7139
0.73125	-57.208	0.73333	22.63
0.73819	-59.1029	0.74028	28.6507
0.74514	-65.0186	0.74722	34.6017
0.75208	-65.564	0.75417	40.1418
0.75903	-65.8911	0.76111	45.841
0.76597	-65.8568	0.76806	51.3005
0.77292	-66.4542	0.775	57.0082
0.77986	-66.6712	0.78194	61.6666
0.78681	-67.047	0.78889	66.1466
0.79375	-67.3078	0.79583	70.8493
0.80069	-67.5994	0.80278	74.1868
0.80764	-67.841	0.80972	77.6105
0.81458	-67.91	0.81667	80.5067
0.82153	-68.1436	0.82361	83.0677
0.82847	-68.3185	0.83056	85.2952
0.83542	-68.6153	0.8375	87.3359
0.84236	-68.1925	0.84444	88.7538
0.84931	-68.3439	0.85139	89.8166
0.85625	-68.1953	0.85833	89.8905
0.86319	-68.0856	0.86528	90.2242
0.87014	-67.8789	0.87222	90.4477
0.87708	-66.767	0.87917	89.8201
0.88403	-66.5551	0.88611	89.5122
0.89097	-65.9743	0.89306	88.7851
0.89792	-65.3101	0.9	87.9419
0.90486	-64.5967	0.90694	87.0373
0.91181	-63.9993	0.91389	85.5298
0.91875	-63.1176	0.92083	83.799
0.92569	-62.3626	0.92778	82.2117
0.93264	-61.1042	0.93472	80.1298
0.93958	-59.4757	0.94167	78.2563
0.94653	-58.5846	0.94861	76.0524
0.95347	-57.0731	0.95556	73.6423
0.96042	-55.7627	0.9625	70.6505
0.96736	-53.6627	0.96944	67.6383
0.97431	-51.5377	0.97639	64.5465
0.98125	-48.9779	0.98333	61.1541
0.98819	-46.3263	0.99028	57.8961
0.99514	-43.2732	0.99722	54.8647
1.00208	-40.0434	1.00417	52.0015
1.00903	-37.4654	1.01111	48.5394
1.01597	-34.4284	1.01806	45.3875
1.02292	-31.5806	1.025	42.1725
1.02986	-27.7736	1.03194	38.9317
1.03681	-24.2406	1.03889	35.8183
1.04375	-20.6858	1.04583	32.8549
1.05069	-17.5956	1.05278	29.7743
1.05764	-15.0455	1.05972	26.5174
1.06458	-12.2996	1.06667	23.669
1.07153	-9.61521	1.07361	19.9609
1.07847	-7.29968	1.08056	16.6505
1.08542	-5.13483	1.0875	12.9836
1.09236	-2.59345	1.09444	9.81487
1.09931	-0.37338	1.10139	6.52442
1.10625	1.94017	1.10833	3.01717
1.11319	4.10103	1.11528	-0.775347
1.12014	6.2151	1.12222	-4.17462
1.12708	8.16704	1.12917	-7.17603
1.13403	10.1262	1.13611	-10.5708
1.14097	12.9809	1.14306	-13.824
1.14792	15.1612	1.15	-17.2706
1.15486	17.4277	1.15694	-20.1779
1.16181	20.1049	1.16389	-23.51
1.16875	22.4842	1.17083	-26.4729
1.17569	24.5504	1.17778	-29.6965
1.18264	27.1041	1.18472	-32.799
1.18958	29.5462	1.19167	-35.9803
1.19653	31.5303	1.19861	-38.5198
1.20347	33.3066	1.20556	-41.7342
1.21042	34.9207	1.2125	-44.7617
1.21736	36.2354	1.21944	-46.9719
1.22431	37.1076	1.22639	-49.4624
1.23125	38.2244	1.23333	-52.1981
1.23819	39.4608	1.24028	-54.4807
1.24514	39.924	1.24722	-56.6424
1.25208	40.476	1.25417	-58.9194
1.25903	41.3913	1.26111	-60.8946
1.26597	41.4767	1.26806	-62.8987
1.27292	41.4423	1.275	-64.345
1.27986	41.5434	1.28194	-66.3508
1.28681	41.8047	1.28889	-67.6044
1.29375	42.1039	1.29583	-68.9481
1.30069	42.592	1.30278	-70.7463
1.30764	43.1877	1.30972	-71.7953
1.31458	43.3353	1.31667	-72.768
1.32153	43.3335	1.32361	-73.9085
1.32847	43.8908	1.33056	-74.6057
1.33542	44.4321	1.3375	-75.2849
1.34236	44.5495	1.34444	-76.1724
1.34931	44.8004	1.35139	-76.6322
1.35625	44.7737	1.35833	-76.9233
1.36319	44.9731	1.36528	-77.1307
1.37014	44.3667	1.37222	-77.6547
1.37708	43.8133	1.37917	-77.966
1.38403	43.3785	1.38611	-78.0129
1.39097	42.5208	1.39306	-78.1474
1.39792	41.6544	1.4	-78.1163
1.40486	40.608	1.40694	-77.5848
1.41181	38.9679	1.41389	-77.352
1.41875	37.667	1.42083	-76.8532
1.42569	35.7293	1.42778	-75.7029
1.43264	33.9068	1.43472	-75.312
1.43958	32.5972	1.44167	-74.6176
1.44653	30.7253	1.44861	-73.7803
1.45347	29.3615	1.45556	-72.5961
1.46042	27.6442	1.4625	-71.386
1.46736	25.2098	1.46944	-69.8755
1.47431	23.2976	1.47639	-68.7306
1.48125	21.2231	1.48333	-67.233
1.48819	19.7591	1.49028	-66.0916
1.49514	18.2763	1.49722	-64.5989
1.50208	16.2322	1.50417	-63.2756
1.50903	14.9169	1.51111	-61.8789
1.51597	13.2147	1.51806	-59.6694
1.52292	10.9857	1.525	-57.6909
1.52986	9.0599	1.53194	-55.7878
1.53681	6.86677	1.53889	-53.684
1.54375	4.94594	1.54583	-51.8636
1.55069	3.1827	1.55278	-49.8435
1.55764	1.31659	1.55972	-47.6389
1.56458	-0.435374	1.56667	-44.9883
1.57153	-2.70204	1.57361	-42.1082
1.57847	-5.01916	1.58056	-39.7532
1.58542	-6.99697	1.5875	-36.6352
1.59236	-9.46118	1.59444	-33.9607
1.59931	-11.444	1.60139	-31.2806
1.60625	-13.1973	1.60833	-28.3322
1.61319	-14.9009	1.61528	-25.4276
1.62014	-16.6209	1.62222	-22.6893
1.62708	-18.3404	1.62917	-19.6994
1.63403	-20.018	1.63611	-16.5035
1.64097	-21.5626	1.64306	-13.281
1.64792	-23.0269	1.65	-10.6413
1.65486	-24.4333	1.65694	-7.86238
1.66181	-25.9388	1.66389	-4.64348
1.66875	-27.0871	1.67083	-2.34269
1.67569	-28.242	1.67778	0.536599
1.68264	-29.6494	1.68472	3.52318
1.68958	-30.9533	1.69167	6.30446
1.69653	-32.4191	1.69861	8.93684
1.70347	-33.746	1.70556	11.8579
1.71042	-34.9256	1.7125	14.7887
1.71736	-35.8994	1.71944	17.0601
1.72431	-37.0754	1.72639	19.8753
1.73125	-38.2805	1.73333	22.5561
1.73819	-39.3214	1.74028	25.056
1.74514	-40.1816	1.74722	27.58
1.75208	-41.4823	1.75417	30.381
1.75903	-42.2325	1.76111	32.7509
1.76597	-42.8663	1.76806	34.4555
1.77292	-43.6132	1.775	36.2667
1.77986	-44.3048	1.78194	38.4623
1.78681	-44.7117	1.78889	40.035
1.79375	-45.4492	1.79583	41.8839
1.80069	-46.0851	1.80278	43.6104
1.80764	-46.6197	1.80972	45.2597
1.81458	-46.698	1.81667	46.7303
1.82153	-46.9417	1.82361	48.2628
1.82847	-47.0499	1.83056	49.4525
1.83542	-46.6532	1.8375	50.8014
1.84236	-46.6925	1.84444	51.925
1.84931	-46.477	1.85139	53.0398
1.85625	-46.4581	1.85833	54.0881
1.86319	-46.1261	1.86528	55.0394
1.87014	-45.7393	1.87222	56.4225
1.87708	-44.8986	1.87917	57.1319
1.88403	-44.3711	1.88611	58.0446
1.89097	-43.4573	1.89306	58.1823
1.89792	-43.0962	1.9	58.5991
1.90486	-42.4748	1.90694	58.4577
1.91181	-41.4291	1.91389	58.5364
1.91875	-41.0746	1.92083	58.3812
1.92569	-39.9509	1.92778	58.1037
1.93264	-39.0492	1.93472	57.8101
1.93958	-37.9175	1.94167	57.3413
1.94653	-36.767	1.94861	56.4851
1.95347	-35.9804	1.95556	55.5772
1.96042	-34.9861	1.9625	54.6414
1.96736	-33.6347	1.96944	53.6116
1.97431	-32.8609	1.97639	52.6269
1.98125	-31.3848	1.98333	51.6928
1.98819	-29.8524	1.99028	50.9182
1.99514	-28.9434	1.99722	49.5851
2.00208	-27.1613	2.00417	48.1269
2.00903	-25.9748	2.01111	46.579
2.01597	-24.7492	2.01806	45.1331
2.02292	-23.0164	2.025	43.5121
2.02986	-21.6093	2.03194	42.1004
2.03681	-19.6877	2.03889	40.4643
2.04375	-18.081	2.04583	38.5042
2.05069	-16.2229	2.05278	36.5712
2.05764	-14.1841	2.05972	34.8288
2.06458	-12.4758	2.06667	32.4254
2.07153	-11.2147	2.07361	30.2238
2.07847	-9.14169	2.08056	28.4598
2.08542	-7.44427	2.0875	26.39
2.09236	-5.20933	2.09444	24.3889
2.09931	-2.90023	2.10139	22.1867
2.10625	-1.24788	2.10833	20.157
2.11319	1.06005	2.11528	18.287
2.12014	2.96149	2.12222	16.0855
2.12708	4.84831	2.12917	14.1992
2.13403	6.65559	2.13611	11.839
2.14097	8.74318	2.14306	9.2027
2.14792	10.7174	2.15	7.26163
2.15486	13.1937	2.15694	5.17617
2.16181	15.0326	2.16389	2.72358
2.16875	16.8978	2.17083	0.704573
2.17569	18.4674	2.17778	-1.43852
2.18264	19.952	2.18472	-3.14895
2.18958	21.7664	2.19167	-5.01795
2.19653	23.2669	2.19861	-7.5623
2.20347	25.0158	2.20556	-9.67139
2.21042	26.4365	2.2125	-11.7177
2.21736	28.0165	2.21944	-13.4568
2.22431	29.3427	2.22639	-15.3125
2.23125	30.479	2.23333	-17.3381
2.23819	31.5643	2.24028	-19.5464
2.24514	32.7647	2.24722	-21.5607
2.25208	34.1654	2.25417	-23.8409
2.25903	35.4211	2.26111	-25.4904
2.26597	36.6256	2.26806	-27.8556
2.27292	37.8866	2.275	-29.9819
2.27986	38.3094	2.28194	-31.594
2.28681	38.6204	2.28889	-33.5546
2.29375	39.4547	2.29583	-35.243
2.30069	39.7625	2.30278	-36.5471
2.30764	40.1681	2.30972	-37.8147
2.31458	40.8999	2.31667	-38.9229
2.32153	41.4994	2.32361	-39.7759
2.32847	41.9506	2.33056	-40.4051
2.33542	41.8305	2.3375	-41.117
2.34236	42.0504	2.34444	-41.9773
2.34931	41.8923	2.35139	-42.3847
2.35625	41.511	2.35833	-43.2571
2.36319	41.8912	2.36528	-43.7461
2.37014	42.0858	2.37222	-43.9546
2.37708	42.0413	2.37917	-44.6631
2.38403	41.9291	2.38611	-45.4556
2.39097	41.318	2.39306	-45.863
2.39792	40.7541	2.4	-46.2984
2.40486	39.9107	2.40694	-46.8047
2.41181	39.2608	2.41389	-47.2936
2.41875	38.2694	2.42083	-47.3886
2.42569	37.1236	2.42778	-47.767
2.43264	36.4928	2.43472	-47.9513
2.43958	35.649	2.44167	-47.4971
2.44653	34.6651	2.44861	-47.2823
2.45347	33.1774	2.45556	-47.1712
2.46042	31.6258	2.4625	-46.8196
2.46736	30.3642	2.46944	-46.5359
2.47431	29.5912	2.47639	-46.0447
2.48125	28.2981	2.48333	-45.5564
2.48819	27.0264	2.49028	-45.3282
2.49514	25.7043	2.49722	-44.6205
2.50208	24.617	2.50417	-43.8657
2.50903	23.3928	2.51111	-42.8524
2.51597	21.2831	2.51806	-41.8119
2.52292	19.4722	2.525	-40.9839
2.52986	17.9058	2.53194	-40.3049
2.53681	16.3181	2.53889	-39.1574
2.54375	14.9315	2.54583	-37.8874
2.55069	12.9247	2.55278	-36.8032
2.55764	10.6148	2.55972	-35.5177
2.56458	9.14706	2.56667	-34.1166
2.57153	7.24076	2.57361	-32.1226
2.57847	5.09059	2.58056	-30.6584
2.58542	3.42404	2.5875	-28.9125
2.59236	1.57083	2.59444	-27.4096
2.59931	0.109256	2.60139	-25.5927
2.60625	-1.39491	2.60833	-23.8766
2.61319	-3.24388	2.61528	-21.7855
2.62014	-4.72803	2.62222	-20.233
2.62708	-6.34148	2.62917	-18.5309
2.63403	-7.71497	2.63611	-16.224
2.64097	-8.94551	2.64306	-14.3629
2.64792	-10.8566	2.65	-12.2606
2.65486	-12.6555	2.65694	-10.3081
2.66181	-13.6107	2.66389	-8.51166
2.66875	-15.2932	2.67083	-6.82716
2.67569	-16.6394	2.67778	-4.83031
2.68264	-17.9413	2.68472	-2.84673
2.68958	-19.3028	2.69167	-0.743863
2.69653	-20.7887	2.69861	0.947416
2.70347	-21.9875	2.70556	3.2312
2.71042	-23.2735	2.7125	5.50266
2.71736	-24.2487	2.71944	7.59582
2.72431	-25.5913	2.72639	10.1657
2.73125	-26.6769	2.73333	11.8321
2.73819	-27.8338	2.74028	13.4528
2.74514	-29.4959	2.74722	15.6729
2.75208	-29.8784	2.75417	17.4923
2.75903	-31.2666	2.76111	19.4665
2.76597	-31.9756	2.76806	21.1319
2.77292	-32.8143	2.775	22.9517
2.77986	-33.2673	2.78194	25.0694
2.78681	-33.7922	2.78889	26.7404
2.79375	-34.8373	2.79583	28.1884
2.80069	-35.5132	2.80278	29.7438
2.80764	-35.4066	2.80972	30.8057
2.81458	-35.9158	2.81667	32.4069
2.82153	-35.7686	2.82361	33.8759
2.82847	-35.8415	2.83056	34.9688
2.83542	-36.6858	2.8375	36.4197
2.84236	-36.6459	2.84444	37.5779
2.84931	-36.9964	2.85139	38.5701
2.85625	-37.3285	2.85833	39.1831
2.86319	-37.6021	2.86528	39.8497
2.87014	-37.5473	2.87222	40.7333
2.87708	-37.0992	2.87917	41.4451
2.88403	-36.7693	2.88611	42.0488
2.89097	-36.622	2.89306	42.5308
2.89792	-35.9465	2.9	43.1118
2.90486	-35.3351	2.90694	43.6547
2.91181	-34.8731	2.91389	44.0382
2.91875	-34.1589	2.92083	44.0821
2.92569	-33.8581	2.92778	44.0343
2.93264	-33.039	2.93472	43.9142
2.93958	-32.3631	2.94167	43.8703
2.94653	-31.7599	2.94861	43.757
2.95347	-30.7959	2.95556	43.1319
2.96042	-29.9037	2.9625	42.9347
2.96736	-29.0323	2.96944	42.4852
2.97431	-28.3896	2.97639	42.1844
2.98125	-27.4858	2.98333	41.421
2.98819	-26.7775	2.99028	40.7439
2.99514	-25.5852	2.99722	40.1837
3.00208	-24.3005	3.00417	39.0611
3.00903	-22.4466	3.01111	38.2454
3.01597	-21.1723	3.01806	37.8087
3.02292	-19.5316	3.025	36.931
3.02986	-17.7395	3.03194	35.9766
3.03681	-16.6086	3.03889	35.2904
3.04375	-15.0145	3.04583	33.9702
3.05069	-13.5707	3.05278	32.7535
3.05764	-12.0673	3.05972	31.0669
3.06458	-10.4193	3.06667	30.0233
3.07153	-8.62422	3.07361	28.5763
3.07847	-6.77321	3.08056	27.08
3.08542	-5.4142	3.0875	26.0439
3.09236	-4.12868	3.09444	24.7343
3.09931	-2.4187	3.10139	22.8376
3.10625	-1.11229	3.10833	21.4453
3.11319	0.23285	3.11528	19.8087
3.12014	1.68316	3.12222	18.1823
3.12708	3.23511	3.12917	16.4986
3.13403	5.32246	3.13611	14.5613
3.14097	7.0258	3.14306	13.078
3.14792	8.50941	3.15	11.0344
3.15486	9.73073	3.15694	9.38274
3.16181	11.0864	3.16389	7.75449
3.16875	12.8629	3.17083	6.09536
3.17569	14.1948	3.17778	4.51126
3.18264	15.776	3.18472	3.16356
3.18958	17.4424	3.19167	1.41175
3.19653	18.8745	3.19861	-0.0278252
3.20347	20.4294	3.20556	-1.59347
3.21042	21.7587	3.2125	-2.97404
3.21736	22.5186	3.21944	-3.82876
3.22431	23.857	3.22639	-5.24912
3.23125	25.0931	3.23333	-6.60812
3.23819	26.5656	3.24028	-8.03567
3.24514	27.558	3.24722	-9.2798
3.25208	28.3809	3.25417	-10.5451
3.25903	29.4079	3.26111	-11.9991
3.26597	30.0162	3.26806	-13.4673
3.27292	30.8269	3.275	-14.7579
3.27986	31.8098	3.28194	-16.0553
3.28681	32.8053	3.28889	-17.6835
3.29375	33.498	3.29583	-18.7583
3.30069	34.0481	3.30278	-20.4984
3.30764	34.3252	3.30972	-21.6519
3.31458	34.6842	3.31667	-22.6563
3.32153	35.1552	3.32361	-23.4796
3.32847	35.8054	3.33056	-24.5308
3.33542	36.067	3.3375	-25.7428
3.34236	36.5551	3.34444	-26.6916
3.34931	36.7285	3.35139	-27.6069
3.35625	36.6544	3.35833	-28.2954
3.36319	36.7209	3.36528	-28.9276
3.37014	36.2339	3.37222	-29.5034
3.37708	35.924	3.37917	-30.2648
3.38403	35.7646	3.38611	-30.7168
3.39097	35.9828	3.39306	-31.1636
3.39792	35.5942	3.4	-31.435
3.40486	35.2125	3.40694	-31.8129
3.41181	34.4739	3.41389	-32.1585
3.41875	33.5705	3.42083	-32.4023
3.42569	32.5996	3.42778	-32.3471
3.43264	31.7184	3.43472	-32.7054
3.43958	31.1774	3.44167	-32.7532
3.44653	30.2154	3.44861	-33.1191
3.45347	29.494	3.45556	-32.9032
3.46042	28.6614	3.4625	-32.844
3.46736	27.525	3.46944	-32.5813
3.47431	25.6742	3.47639	-32.3839
3.48125	24.442	3.48333	-32.2911
3.48819	23.2658	3.49028	-31.9715
3.49514	21.7	3.49722	-31.7776
3.50208	20.9888	3.50417	-31.3381
3.50903	20.0766	3.51111	-31.4701
3.51597	19.1722	3.51806	-30.7332
3.52292	18.0295	3.525	-29.9702
3.52986	16.6222	3.53194	-29.3982
3.53681	15.3797	3.53889	-28.8202
3.54375	14.0262	3.54583	-28.0953
3.55069	12.8454	3.55278	-27.3441
3.55764	12.1928	3.55972	-26.4125
3.56458	10.96	3.56667	-25.6523
3.57153	9.6066	3.57361	-24.9868
3.57847	8.60996	3.58056	-23.9752
3.58542	7.16835	3.5875	-23.131
3.59236	5.41195	3.59444	-21.8788
3.59931	3.69619	3.60139	-20.634
3.60625	2.1693	3.60833	-19.7398
3.61319	0.813523	3.61528	-18.522
3.62014	-0.565366	3.62222	-17.3517
3.62708	-1.79622	3.62917	-16.0714
3.63403	-2.95646	3.63611	-14.6815
3.64097	-4.75923	3.64306	-13.786
3.64792	-5.6141	3.65	-12.3497
3.65486	-6.81271	3.65694	-11.1028
3.66181	-8.10224	3.66389	-9.50774
3.66875	-9.28883	3.67083	-8.01176
3.67569	-10.1887	3.67778	-6.52969
3.68264	-10.9851	3.68472	-5.39179
3.68958	-12.0638	3.69167	-4.3004
3.69653	-12.9603	3.69861	-2.92383
3.70347	-13.7996	3.70556	-1.60792
3.71042	-14.7098	3.7125	-0.26606
3.71736	-15.9406	3.71944	1.01523
3.72431	-16.4147	3.72639	2.6038
3.73125	-17.6056	3.73333	3.79319
3.73819	-18.5828	3.74028	5.35725
3.74514	-19.428	3.74722	6.40927
3.75208	-20.354	3.75417	7.73146
3.75903	-20.8578	3.76111	8.71635
3.76597	-21.7271	3.76806	10.0116
3.77292	-22.002	3.775	11.3806
3.77986	-22.7846	3.78194	12.5651
3.78681	-23.6968	3.78889	14.0035
3.79375	-24.4607	3.79583	15.1403
3.80069	-24.9581	3.80278	16.1861
3.80764	-25.368	3.80972	17.1753
3.81458	-25.9001	3.81667	18.0397
3.82153	-26.531	3.82361	18.8125
3.82847	-26.6383	3.83056	19.6107
3.83542	-27.0009	3.8375	20.3564
3.84236	-27.4639	3.84444	21.744
3.84931	-27.5669	3.85139	22.559
3.85625	-28.0538	3.85833	23.4215
3.86319	-27.9637	3.86528	24.2083
3.87014	-27.976	3.87222	24.552
3.87708	-27.8924	3.87917	25.0837
3.88403	-27.6658	3.88611	25.4447
3.89097	-27.9166	3.89306	25.9993
3.89792	-28.0785	3.9	26.4668
3.90486	-28.0998	3.90694	26.6136
3.91181	-28.1561	3.91389	26.954
3.91875	-28.1352	3.92083	26.9685
3.92569	-27.7836	3.92778	26.6674
3.93264	-27.4932	3.93472	27.0918
3.93958	-27.3723	3.94167	26.8096
3.94653	-27.1172	3.94861	26.8728
3.95347	-26.7458	3.95556	26.9853
3.96042	-26.3116	3.9625	26.9832
3.96736	-25.8794	3.96944	26.7583
3.97431	-25.4443	3.97639	26.5875
3.98125	-24.5015	3.98333	26.5498
3.98819	-23.4846	3.99028	26.4422
3.99514	-22.8497	3.99722	26.0739
4.00208	-21.7586	4.00417	25.5253
4.00903	-21.362	4.01111	25.2543
4.01597	-20.7722	4.01806	24.112
4.02292	-20.0078	4.025	23.5957
4.02986	-19.0543	4.03194	22.8797
4.03681	-18.3904	4.03889	22.2246
4.04375	-17.821	4.04583	21.4428
4.05069	-17.1108	4.05278	21.0804
4.05764	-16.3387	4.05972	20.2668
4.06458	-15.6362	4.06667	19.5812
4.07153	-15.0451	4.07361	18.8273
4.07847	-13.6376	4.08056	17.6378
4.08542	-12.5923	4.0875	17.234
4.09236	-11.4042	4.09444	16.0453
4.09931	-10.4253	4.10139	15.575
4.10625	-9.30261	4.10833	15.21
4.11319	-8.33187	4.11528	14.2287
4.12014	-6.98719	4.12222	13.2388
4.12708	-5.71974	4.12917	12.2206
4.13403	-4.52711	4.13611	11.2029
4.14097	-3.20461	4.14306	10.4581
4.14792	-2.00033	4.15	9.40327
4.15486	-0.712137	4.15694	8.04329
4.16181	0.140042	4.16389	7.12996
4.16875	1.03497	4.17083	6.07927
4.17569	1.83528	4.17778	5.50843
4.18264	2.97696	4.18472	4.39168
4.18958	3.88961	4.19167	2.98792
4.19653	4.67096	4.19861	2.07037
4.20347	5.74498	4.20556	1.21492
4.21042	7.11545	4.2125	0.260581
4.21736	8.32678	4.21944	-1.31898
4.22431	9.5629	4.22639	-2.53175
4.23125	10.644	4.23333	-3.35768
4.23819	11.5538	4.24028	-4.18326
4.24514	12.5763	4.24722	-5.0037
4.25208	13.649	4.25417	-5.94444
4.25903	14.9965	4.26111	-6.93862
4.26597	16.377	4.26806	-8.06245
4.27292	17.5296	4.275	-9.19365
4.27986	18.4547	4.28194	-10.0619
4.28681	19.3757	4.28889	-11.0853
4.29375	19.9617	4.29583	-11.8051
4.30069	20.4546	4.30278	-12.2486
4.30764	21.0507	4.30972	-12.8174
4.31458	21.6542	4.31667	-14.0224
4.32153	22.7067	4.32361	-14.5869
4.32847	23.2266	4.33056	-15.3068
4.33542	23.717	4.3375	-16.1473
4.34236	24.2237	4.34444	-16.9052
4.34931	24.4751	4.35139	-17.604
4.35625	25.1504	4.35833	-18.081
4.36319	25.6215	4.36528	-19.0921
4.37014	25.8981	4.37222	-19.8305
4.37708	26.3421	4.37917	-20.7113
4.38403	26.7824	4.38611	-21.3133
4.39097	26.8778	4.39306	-21.911
4.39792	27.04	4.4	-22.5027
4.40486	26.7649	4.40694	-22.9332
4.41181	26.4697	4.41389	-23.2358
4.41875	26.559	4.42083	-23.5616
4.42569	26.4889	4.42778	-23.8171
4.43264	26.2754	4.43472	-23.9203
4.43958	25.7989	4.44167	-24.0142
4.44653	25.4868	4.44861	-24.1046
4.45347	25.0888	4.45556	-23.9932
4.46042	24.5221	4.4625	-23.8478
4.46736	23.9929	4.46944	-23.8161
4.47431	23.3563	4.47639	-23.8766
4.48125	22.7156	4.48333	-23.6478
4.48819	22.2369	4.49028	-23.7437
4.49514	21.9606	4.49722	-23.5015
4.50208	21.0931	4.50417	-22.9684
4.50903	20.1723	4.51111	-22.6877
4.51597	19.2393	4.51806	-22.2155
4.52292	18.5118	4.525	-21.8352
4.52986	17.7114	4.53194	-21.2665
4.53681	16.6642	4.53889	-20.7803
4.54375	15.6904	4.54583	-20.2668
4.55069	14.9467	4.55278	-19.6029
4.55764	14.2335	4.55972	-19.0703
4.56458	13.4554	4.56667	-18.1369
4.57153	12.5555	4.57361	-17.4828
4.57847	11.6672	4.58056	-16.8651
4.58542	10.5246	4.5875	-16.4467
4.59236	9.82155	4.59444	-15.7201
4.59931	9.03138	4.60139	-14.8031
4.60625	8.139	4.60833	-13.9475
4.61319	7.11476	4.61528	-12.9756
4.62014	6.21984	4.62222	-12.2668
4.62708	5.40016	4.62917	-11.4326
4.63403	4.10034	4.63611	-10.4259
4.64097	3.11205	4.64306	-9.38392
4.64792	2.12278	4.65	-8.64491
4.65486	1.06265	4.65694	-7.73271
4.66181	0.209698	4.66389	-6.65765
4.66875	-0.297319	4.67083	-5.70182
4.67569	-1.49959	4.67778	-4.91773
4.68264	-2.25	4.68472	-4.22236
4.68958	-3.26716	4.69167	-3.48972
4.69653	-4.00975	4.69861	-2.3589
4.70347	-4.67045	4.70556	-1.49692
4.71042	-5.35606	4.7125	-0.464296
4.71736	-5.52648	4.71944	-0.0179797
4.72431	-6.38035	4.72639	0.802534
4.73125	-6.6637	4.73333	1.9169
4.73819	-7.34569	4.74028	3.13107
4.74514	-8.03001	4.74722	4.10306
4.75208	-8.73659	4.75417	5.45947
4.75903	-9.40665	4.76111	6.33233
4.76597	-9.97774	4.76806	7.49989
4.77292	-10.5345	4.775	8.80514
4.77986	-11.0923	4.78194	9.36342
4.78681	-11.692	4.78889	10.1884
4.79375	-12.5445	4.79583	11.0274
4.80069	-13.5263	4.80278	12.554
4.80764	-14.153	4.80972	13.1455
4.81458	-15.0928	4.81667	13.5605
4.82153	-15.4774	4.82361	14.2798
4.82847	-16.3544	4.83056	14.6836
4.83542	-16.9954	4.8375	15.2281
4.84236	-17.1621	4.84444	15.8918
4.84931	-18.1054	4.85139	16.2953
4.85625	-18.6221	4.85833	16.6281
4.86319	-19.2076	4.86528	17.1089
4.87014	-19.7161	4.87222	17.8578
4.87708	-20.0186	4.87917	18.2619
4.88403	-20.6685	4.88611	18.1194
4.89097	-20.6914	4.89306	18.393
4.89792	-20.9969	4.9	19.1265
4.90486	-21.6527	4.90694	19.1127
4.91181	-21.7522	4.91389	19.5426
4.91875	-21.8016	4.92083	19.8171
4.92569	-21.9554	4.92778	20.3401
4.93264	-21.7403	4.93472	20.4745
4.93958	-21.732	4.94167	20.5969
4.94653	-21.5973	4.94861	20.7594
4.95347	-21.2846	4.95556	20.8712
4.96042	-21.0779	4.9625	20.8872
4.96736	-20.7884	4.96944	21.0941
4.97431	-20.4808	4.97639	21.2682
4.98125	-20.2981	4.98333	20.6737
4.98819	-19.849	4.99028	20.5741
4.99514	-19.606	4.99722	20.3298
5.00208	-19.3788	5.00417	19.7309
5.00903	-18.9082	5.01111	18.6971
5.01597	-18.7038	5.01806	18.3108
5.02292	-18.4678	5.025	17.7331
5.02986	-17.9028	5.03194	17.2281
5.03681	-17.5362	5.03889	16.3754
5.04375	-17.3811	5.04583	15.8191
5.05069	-16.5166	5.05278	14.9007
5.05764	-16.3955	5.05972	14.1936
5.06458	-16.1472	5.06667	13.696
5.07153	-15.6195	5.07361	13.1839
5.07847	-14.878	5.08056	12.4261
5.08542	-14.2104	5.0875	11.8068
5.09236	-13.8712	5.09444	11.4414
5.09931	-13.1572	5.10139	10.8664
5.10625	-12.1157	5.10833	10.3978
5.11319	-11.6831	5.11528	9.73648
5.12014	-11.0199	5.12222	8.86344
5.12708	-10.058	5.12917	8.28358
5.13403	-9.59023	5.13611	7.57387
5.14097	-8.44247	5.14306	6.81031
5.14792	-7.27226	5.15	5.94642
5.15486	-6.32448	5.15694	4.80017
5.16181	-5.56477	5.16389	4.24799
5.16875	-4.55222	5.17083	3.52026
5.17569	-3.91168	5.17778	3.20897
5.18264	-2.82463	5.18472	2.27522
5.18958	-1.87744	5.19167	1.54671
5.19653	-0.785716	5.19861	0.922732
5.20347	0.209188	5.20556	0.397476
5.21042	1.25762	5.2125	-0.416356
5.21736	2.20508	5.21944	-1.23365
5.22431	3.02585	5.22639	-1.94227
5.23125	3.73442	5.23333	-2.728
5.23819	4.54832	5.24028	-3.00075
5.24514	5.6755	5.24722	-3.62146
5.25208	6.37537	5.25417	-4.46829
5.25903	7.33476	5.26111	-5.30964
5.26597	8.09594	5.26806	-5.94346
5.27292	8.67407	5.275	-6.82182
5.27986	9.69576	5.28194	-7.45469
5.28681	10.3583	5.28889	-7.97014
5.29375	11.1757	5.29583	-8.78812
5.30069	12.1894	5.30278	-9.47769
5.30764	12.8183	5.30972	-9.7704
5.31458	13.7206	5.31667	-10.3691
5.32153	14.3039	5.32361	-10.7916
5.32847	14.4874	5.33056	-11.5467
5.33542	14.8232	5.3375	-11.943
5.34236	15.5216	5.34444	-12.4689
5.34931	15.9322	5.35139	-12.9427
5.35625	16.5121	5.35833	-13.1376
5.36319	16.8593	5.36528	-13.795
5.37014	17.3499	5.37222	-14.1173
5.37708	17.6556	5.37917	-14.4978
5.38403	17.6712	5.38611	-14.2786
5.39097	17.8912	5.39306	-14.4729
5.39792	18.1385	5.4	-14.3058
5.40486	18.7142	5.40694	-14.5507
5.41181	19.245	5.41389	-14.9391
5.41875	19.6486	5.42083	-15.0715
5.42569	19.5157	5.42778	-15.2321
5.43264	19.7685	5.43472	-15.1919
5.43958	19.6364	5.44167	-15.1259
5.44653	19.3712	5.44861	-15.0431
5.45347	19.4198	5.45556	-15.199
5.46042	18.8169	5.4625	-15.3226
5.46736	18.7033	5.46944	-15.4393
5.47431	18.6954	5.47639	-15.8351
5.48125	18.4965	5.48333	-16.1864
5.48819	18.2682	5.49028	-15.9845
5.49514	18.2666	5.49722	-15.6972
5.50208	18.0547	5.50417	-15.7697
5.50903	18.2223	5.51111	-15.5818
5.51597	17.6549	5.51806	-15.5943
5.52292	17.3833	5.525	-15.748
5.52986	17.1057	5.53194	-15.5358
5.53681	16.4925	5.53889	-15.2339
5.54375	16.7966	5.54583	-14.8681
5.55069	16.3891	5.55278	-14.779
5.55764	16.165	5.55972	-14.4319
5.56458	15.7701	5.56667	-13.7863
5.57153	15.121	5.57361	-13.3248
5.57847	14.0091	5.58056	-12.8998
5.58542	13.3845	5.5875	-12.3356
5.59236	12.5639	5.59444	-12.0693
5.59931	12.1775	5.60139	-11.497
5.60625	11.5067	5.60833	-10.9749
5.61319	10.6465	5.61528	-10.5012
5.62014	9.95511	5.62222	-10.2802
5.62708	8.99143	5.62917	-9.49506
5.63403	8.19576	5.63611	-9.03781
5.64097	6.99899	5.64306	-8.34215
5.64792	6.13754	5.65	-7.52214
5.65486	5.53469	5.65694	-7.2379
5.66181	4.96816	5.66389	-6.9828
5.66875	4.21275	5.67083	-6.2489
5.67569	3.41033	5.67778	-5.51706
5.68264	2.32796	5.68472	-4.94724
5.68958	1.6191	5.69167	-4.51272
5.69653	0.980785	5.69861	-3.84075
5.70347	0.258349	5.70556	-3.0056
5.71042	-0.585785	5.7125	-2.54434
5.71736	-1.36609	5.71944	-1.61133
5.72431	-2.25034	5.72639	-0.890396
5.73125	-3.12812	5.73333	-0.227324
5.73819	-4.24295	5.74028	0.646045
5.74514	-5.08342	5.74722	1.5962
5.75208	-5.74146	5.75417	2.3853
5.75903	-6.49758	5.76111	2.8438
5.76597	-7.2411	5.76806	3.81831
5.77292	-7.81871	5.775	4.49817
5.77986	-8.49468	5.78194	5.32626
5.78681	-9.05361	5.78889	5.82418
5.79375	-9.73036	5.79583	6.69929
5.80069	-10.2567	5.80278	7.69039
5.80764	-10.6109	5.80972	8.66978
5.81458	-11.1387	5.81667	9.25988
5.82153	-11.3891	5.82361	9.84367
5.82847	-12.0772	5.83056	10.5178
5.83542	-12.5145	5.8375	10.9417
5.84236	-12.8325	5.84444	11.4109
5.84931	-13.1008	5.85139	11.5965
5.85625	-13.6578	5.85833	12.3658
5.86319	-13.8662	5.86528	12.7657
5.87014	-14.1287	5.87222	13.4899
5.87708	-14.1408	5.87917	13.6551
5.88403	-14.0318	5.88611	13.5469
5.89097	-13.9361	5.89306	13.7957
5.89792	-13.9771	5.9	13.9503
5.90486	-13.9464	5.90694	13.9485
5.91181	-13.6967	5.91389	13.9658
5.91875	-13.7885	5.92083	14.217
5.92569	-13.7356	5.92778	14.3672
5.93264	-13.6836	5.93472	14.4297
5.93958	-13.6389	5.94167	14.2237
5.94653	-13.5788	5.94861	14.2913
5.95347	-13.4827	5.95556	14.0029
5.96042	-13.4761	5.9625	14.2646
5.96736	-13.5669	5.96944	14.5978
5.97431	-13.9729	5.97639	14.529
5.98125	-13.7391	5.98333	14.4296
5.98819	-13.9225	5.99028	14.2354
5.99514	-13.8176	5.99722	14.4195
6.00208	-13.4303	6.00417	14.3305
6.00903	-13.595	6.01111	14.3528
6.01597	-13.4347	6.01806	14.2807
6.02292	-13.3548	6.025	14.265
6.02986	-13.4627	6.03194	14.0854
6.03681	-13.4904	6.03889	14.2915
6.04375	-13.2443	6.04583	14.0249
6.05069	-13.1889	6.05278	13.2235
6.05764	-12.5554	6.05972	12.6181
6.06458	-12.3096	6.06667	12.1396
6.07153	-11.9021	6.07361	11.7162
6.07847	-11.6615	6.08056	11.1733
6.08542	-11.7222	6.0875	10.833
6.09236	-11.0856	6.09444	10.3838
6.09931	-10.7243	6.10139	9.87676
6.10625	-10.0996	6.10833	9.25266
6.11319	-9.46642	6.11528	8.46305
6.12014	-8.76625	6.12222	7.85195
6.12708	-8.29641	6.12917	7.45651
6.13403	-7.57295	6.13611	7.5275
6.14097	-7.1553	6.14306	6.80296
6.14792	-6.94325	6.15	6.2756
6.15486	-6.43124	6.15694	6.15104
6.16181	-5.83877	6.16389	5.55994
6.16875	-5.02693	6.17083	4.63409
6.17569	-4.5446	6.17778	4.21478
6.18264	-3.6315	6.18472	3.7052
6.18958	-2.89063	6.19167	3.23455
6.19653	-2.23788	6.19861	2.88039
6.20347	-1.52833	6.20556	2.14799
6.21042	-0.890779	6.2125	1.38679
6.21736	-0.808078	6.21944	0.437774
6.22431	-0.0973061	6.22639	0.304378
6.23125	0.72195	6.23333	-0.369524
6.23819	1.43734	6.24028	-1.19037
6.24514	1.94613	6.24722	-1.75302
6.25208	2.27931	6.25417	-1.97959
6.25903	3.0965	6.26111	-2.4725
6.26597	3.34323	6.26806	-3.11239
6.27292	3.71806	6.275	-3.4471
6.27986	4.58498	6.28194	-4.11679
6.28681	4.73557	6.28889	-4.79685
6.29375	5.09268	6.29583	-5.40854
6.30069	6.20014	6.30278	-5.88521
6.30764	6.59523	6.30972	-6.53048
6.31458	6.90321	6.31667	-6.91611
6.32153	6.94769	6.32361	-7.4952
6.32847	7.6085	6.33056	-7.93532
6.33542	7.79232	6.3375	-8.46892
6.34236	7.87868	6.34444	-9.14142
6.34931	8.23762	6.35139	-9.56348
6.35625	8.44957	6.35833	-9.90665
6.36319	8.67678	6.36528	-10.0359
6.37014	9.26493	6.37222	-10.3902
6.37708	9.43636	6.37917	-11.1901
6.38403	9.6129	6.38611	-11.3629
6.39097	10.1962	6.39306	-11.7549
6.39792	10.7318	6.4	-11.9649
6.40486	11.1248	6.40694	-12.0109
6.41181	11.0341	6.41389	-12.4271
6.41875	11.4186	6.42083	-12.8227
6.42569	11.6035	6.42778	-12.8816
6.43264	11.5754	6.43472	-13.2483
6.43958	11.5824	6.44167	-13.5595
6.44653	11.073	6.44861	-13.7864
6.45347	11.242	6.45556	-13.818
6.46042	11.1897	6.4625	-13.4245
6.46736	11.0244	6.46944	-13.4123
6.47431	10.7576	6.47639	-13.6554
6.48125	10.4802	6.48333	-14.0345
6.48819	10.7412	6.49028	-14.2895
6.49514	10.6965	6.49722	-14.3657
6.50208	10.5649	6.50417	-14.3613
6.50903	10.4689	6.51111	-14.4753
6.51597	10.6162	6.51806	-14.396
6.52292	10.5784	6.525	-14.0274
6.52986	10.7154	6.53194	-14.0454
6.53681	10.2941	6.53889	-13.9208
6.54375	10.2953	6.54583	-13.9326
6.55069	9.84353	6.55278	-14.0469
6.55764	9.40676	6.55972	-13.3997
6.56458	9.17812	6.56667	-12.8709
6.57153	8.82066	6.57361	-12.4655
6.57847	8.61398	6.58056	-11.7999
6.58542	8.61805	6.5875	-11.5593
6.59236	8.21352	6.59444	-11.1534
6.59931	7.95563	6.60139	-10.5555
6.60625	7.5165	6.60833	-10.5264
6.61319	7.20996	6.61528	-10.1213
6.62014	6.84373	6.62222	-9.77804
6.62708	6.39006	6.62917	-9.13996
6.63403	6.39197	6.63611	-8.61081
6.64097	6.0405	6.64306	-8.39052
6.64792	5.57326	6.65	-7.6326
6.65486	5.20135	6.65694	-7.32246
6.66181	4.99552	6.66389	-6.77119
6.66875	4.45832	6.67083	-6.01217
6.67569	4.08274	6.67778	-5.52927
6.68264	3.67714	6.68472	-5.14775
6.68958	3.55988	6.69167	-4.53472
6.69653	2.90844	6.69861	-4.06366
6.70347	2.66051	6.70556	-3.56818
6.71042	2.21786	6.7125	-3.09527
6.71736	1.6393	6.71944	-2.51204
6.72431	1.47176	6.72639	-1.83799
6.73125	1.06097	6.73333	-1.47961
6.73819	0.645677	6.74028	-0.877231
6.74514	0.391488	6.74722	-0.554603
6.75208	0.0785793	6.75417	-0.191742
6.75903	-0.209536	6.76111	0.47947
6.76597	-1.05912	6.76806	1.38404
6.77292	-1.39062	6.775	1.8056
6.77986	-1.58902	6.78194	2.55334
6.78681	-2.32341	6.78889	3.26346
6.79375	-2.83421	6.79583	3.86133
6.80069	-2.96254	6.80278	4.14896
6.80764	-3.42586	6.80972	4.49926
6.81458	-3.58833	6.81667	4.83486
6.82153	-3.98596	6.82361	5.72779
6.82847	-4.43071	6.83056	6.43503
6.83542	-4.62813	6.8375	7.14858
6.84236	-4.89981	6.84444	7.6912
6.84931	-4.61982	6.85139	7.89974
6.85625	-5.23486	6.85833	8.44616
6.86319	-5.39675	6.86528	8.57313
6.87014	-5.46645	6.87222	9.20119
6.87708	-5.47953	6.87917	9.8289
6.88403	-5.84675	6.88611	10.3874
6.89097	-6.15373	6.89306	10.784
6.89792	-6.40137	6.9	11.1925
6.90486	-6.90541	6.90694	11.1366
6.91181	-7.2989	6.91389	11.6974
6.91875	-7.96385	6.92083	11.631
6.92569	-8.03281	6.92778	11.781
6.93264	-8.64161	6.93472	11.7181
6.93958	-8.54097	6.94167	11.6713
6.94653	-8.92539	6.94861	12.0624
6.95347	-9.09383	6.95556	12.0832
6.96042	-9.11492	6.9625	11.7996
6.96736	-9.29319	6.96944	11.8475
6.97431	-9.41656	6.97639	12.0423
6.98125	-9.50417	6.98333	11.969
6.98819	-9.62901	6.99028	11.871
6.99514	-9.42886	6.99722	10.9907
7.00208	-9.29358	7.00417	10.8979
7.00903	-9.3715	7.01111	10.816
7.01597	-9.06255	7.01806	10.9567
7.02292	-8.87974	7.025	11.2096
7.02986	-8.80841	7.03194	10.9345
7.03681	-8.83582	7.03889	10.8064
7.04375	-9.00979	7.04583	10.8086
7.05069	-8.91567	7.05278	10.6077
7.05764	-8.79463	7.05972	10.1782
7.06458	-8.9578	7.06667	9.92196
7.07153	-8.49021	7.07361	9.6107
7.07847	-8.70929	7.08056	9.70119
7.08542	-8.51568	7.0875	9.76921
7.09236	-8.08565	7.09444	9.27817
7.09931	-8.17091	7.10139	9.02536
7.10625	-8.17747	7.10833	8.30592
7.11319	-8.01684	7.11528	8.09856
7.12014	-7.71217	7.12222	7.4283
7.12708	-7.15667	7.12917	6.80026
7.13403	-6.82319	7.13611	6.43693
7.14097	-6.53421	7.14306	6.30085
7.14792	-5.96035	7.15	5.95811
7.15486	-5.53488	7.15694	5.74491
7.16181	-5.14625	7.16389	5.66851
7.16875	-4.49963	7.17083	5.13602
7.17569	-4.0364	7.17778	5.019
7.18264	-3.29835	7.18472	4.49969
7.18958	-2.88778	7.19167	4.1937
7.19653	-2.14945	7.19861	3.952
7.20347	-1.70182	7.20556	3.82827
7.21042	-1.44951	7.2125	3.58011
7.21736	-1.05608	7.21944	3.3066
7.22431	-0.260055	7.22639	2.7997
7.23125	0.421284	7.23333	2.25248
7.23819	0.758701	7.24028	1.75067
7.24514	1.3345	7.24722	1.1057
7.25208	1.39738	7.25417	0.941824
7.25903	1.30721	7.26111	0.559384
7.26597	1.61222	7.26806	0.354796
7.27292	1.98798	7.275	-0.0287014
7.27986	2.3875	7.28194	-0.483061
7.28681	2.7475	7.28889	-0.735771
7.29375	3.41968	7.29583	-1.34744
7.30069	4.20034	7.30278	-2.05531
7.30764	4.2686	7.30972	-2.51689
7.31458	4.46704	7.31667	-3.06126
7.32153	4.74539	7.32361	-3.1852
7.32847	5.05634	7.33056	-3.59654
7.33542	5.37708	7.3375	-4.43642
7.34236	6.04137	7.34444	-4.88578
7.34931	6.19067	7.35139	-5.2323
7.35625	6.67199	7.35833	-5.4358
7.36319	7.00845	7.36528	-5.90949
7.37014	7.26709	7.37222	-6.32076
7.37708	7.33326	7.37917	-6.28001
7.38403	7.36422	7.38611	-6.46635
7.39097	7.59554	7.39306	-6.73654
7.39792	7.75695	7.4	-6.7144
7.40486	7.93334	7.40694	-7.05117
7.41181	7.92367	7.41389	-7.26221
7.41875	8.1222	7.42083	-7.08905
7.42569	8.29394	7.42778	-7.30298
7.43264	8.45429	7.43472	-7.80573
7.43958	8.19017	7.44167	-8.0986
7.44653	8.07399	7.44861	-8.01954
7.45347	8.13828	7.45556	-8.36349
7.46042	8.20464	7.4625	-8.27658
7.46736	7.98198	7.46944	-8.03425
7.47431	7.90065	7.47639	-8.14122
7.48125	7.86501	7.48333	-8.13868

## Sheet: 4c.Liver Biolum
Misaligned feeding impairs memories. Loh et al. 2015
Source data for Figure 4c.
Liver representative trace
ALIGNED		MISALIGNED
ZT	Baseline-subtracted bioluminescence	ZT	Baseline-subtracted bioluminescence
0.49514	7.37638	0.71389	207.598
0.50208	-0.696034	0.72083	183.344
0.50903	-8.00771	0.72778	159.37
0.51597	-14.4428	0.73472	135.329
0.52292	-20.0181	0.74167	110.983
0.52986	-25.0536	0.74861	87.5768
0.53681	-41.1113	0.75556	66.3918
0.54375	-52.1689	0.7625	45.6835
0.55069	-61.1398	0.76944	25.6591
0.55764	-68.2278	0.77639	7.27033
0.56458	-74.0514	0.78333	-10.4032
0.57153	-78.5424	0.79028	-46.1853
0.57847	-82.1758	0.79722	-62.4272
0.58542	-85.3458	0.80417	-77.4967
0.59236	-88.0482	0.81111	-91.9119
0.59931	-90.3901	0.81806	-105.516
0.60625	-92.3166	0.825	-117.256
0.61319	-94.0439	0.83194	-128.603
0.62014	-95.3072	0.83889	-140.119
0.62708	-96.5297	0.84583	-150.747
0.63403	-97.0556	0.85278	-160.219
0.64097	-97.7607	0.85972	-169.492
0.64792	-98.0934	0.86667	-178.006
0.65486	-98.0228	0.87361	-186.048
0.66181	-100.223	0.88056	-193.267
0.66875	-99.8485	0.8875	-200.088
0.67569	-99.2468	0.89444	-206.576
0.68264	-98.0843	0.90139	-212.456
0.68958	-96.9299	0.90833	-218.299
0.69653	-95.2131	0.91528	-223.613
0.70347	-93.3569	0.92222	-228.318
0.71042	-91.1865	0.92917	-232.654
0.71736	-88.7572	0.93611	-237.174
0.72431	-86.0747	0.94306	-240.943
0.73125	-82.8099	0.95	-244.728
0.73819	-79.6875	0.95694	-248.157
0.74514	-73.2729	0.96389	-251.565
0.75208	-69.3008	0.97083	-254.585
0.75903	-64.7888	0.97778	-257.253
0.76597	-60.1233	0.98472	-258.906
0.77292	-55.1208	0.99167	-260.939
0.77986	-50.0705	0.99861	-262.128
0.78681	-44.738	1.00556	-262.165
0.79375	-39.1679	1.0125	-261.21
0.80069	-33.4675	1.01944	-259.397
0.80764	-27.5607	1.02639	-256.886
0.81458	-21.4807	1.03333	-253.598
0.82153	-15.1577	1.04028	-249.942
0.82847	-9.02256	1.04722	-245.416
0.83542	-2.66282	1.05417	-240.548
0.84236	4.15241	1.06111	-235.324
0.84931	10.744	1.06806	-230.484
0.85625	17.1927	1.075	-224.348
0.86319	24.0451	1.08194	-218.473
0.87014	30.8506	1.08889	-213.058
0.87708	37.8164	1.09583	-207.902
0.88403	44.5264	1.10278	-202.793
0.89097	51.5888	1.10972	-197.935
0.89792	58.1999	1.11667	-193.011
0.90486	64.812	1.12361	-188.026
0.91181	71.4349	1.13056	-183.235
0.91875	77.5884	1.1375	-178.006
0.92569	83.6849	1.14444	-172.501
0.93264	89.5424	1.15139	-167.009
0.93958	95.1125	1.15833	-161.467
0.94653	100.215	1.16528	-155.838
0.95347	105.053	1.17222	-149.887
0.96042	109.574	1.17917	-143.848
0.96736	113.925	1.18611	-137.894
0.97431	117.246	1.19306	-131.659
0.98125	120.457	1.2	-125.35
0.98819	123.42	1.20694	-118.65
0.99514	125.411	1.21389	-111.789
1.00208	127.465	1.22083	-104.963
1.00903	128.461	1.22778	-97.9964
1.01597	129.336	1.23472	-90.8932
1.02292	129.891	1.24167	-83.5817
1.02986	129.852	1.24861	-76.3172
1.03681	129.239	1.25556	-68.8695
1.04375	127.941	1.2625	-61.3854
1.05069	125.904	1.26944	-53.5792
1.05764	123.825	1.27639	-45.8638
1.06458	121.199	1.28333	-37.8826
1.07153	117.801	1.29028	-29.8839
1.07847	114.342	1.29722	-21.7223
1.08542	109.993	1.30417	-13.2678
1.09236	105.436	1.31111	-5.5185
1.09931	100.093	1.31806	2.25493
1.10625	94.1359	1.325	9.93804
1.11319	87.87	1.33194	17.7511
1.12014	81.7401	1.33889	25.6059
1.12708	75.2018	1.34583	33.2764
1.13403	68.8233	1.35278	40.5098
1.14097	61.9956	1.35972	47.7377
1.14792	54.8111	1.36667	54.7541
1.15486	47.9147	1.37361	62.0014
1.16181	40.3214	1.38056	68.5316
1.16875	33.0998	1.3875	74.6912
1.17569	25.6626	1.39444	81.0559
1.18264	18.42	1.40139	87.1001
1.18958	11.3629	1.40833	92.5861
1.19653	4.42239	1.41528	98.5304
1.20347	-3.10142	1.42222	103.336
1.21042	-10.397	1.42917	108.074
1.21736	-17.7029	1.43611	112.831
1.22431	-25.008	1.44306	117.09
1.23125	-31.9063	1.45	121.265
1.23819	-39.1619	1.45694	124.255
1.24514	-45.8636	1.46389	127.233
1.25208	-52.342	1.47083	129.712
1.25903	-58.7582	1.47778	131.822
1.26597	-65.069	1.48472	134.151
1.27292	-70.7941	1.49167	136.019
1.27986	-76.5389	1.49861	136.947
1.28681	-81.9294	1.50556	137.82
1.29375	-87.2446	1.5125	138.446
1.30069	-92.4108	1.51944	138.77
1.30764	-97.2663	1.52639	138.555
1.31458	-102.153	1.53333	137.723
1.32153	-106.491	1.54028	136.999
1.32847	-110.56	1.54722	135.654
1.33542	-114.663	1.55417	133.889
1.34236	-118.49	1.56111	132.146
1.34931	-122.179	1.56806	129.301
1.35625	-125.802	1.575	126.706
1.36319	-129.316	1.58194	123.613
1.37014	-132.154	1.58889	120.5
1.37708	-135.083	1.59583	117.173
1.38403	-137.759	1.60278	112.98
1.39097	-139.926	1.60972	109.38
1.39792	-142.021	1.61667	105.116
1.40486	-143.945	1.62361	100.864
1.41181	-145.771	1.63056	96.7083
1.41875	-147.152	1.6375	92.1915
1.42569	-148.419	1.64444	87.643
1.43264	-149.177	1.65139	83.5565
1.43958	-149.586	1.65833	78.4439
1.44653	-149.695	1.66528	73.3341
1.45347	-149.961	1.67222	68.3254
1.46042	-149.641	1.67917	62.607
1.46736	-149.081	1.68611	57.7149
1.47431	-148.661	1.69306	51.819
1.48125	-147.437	1.7	46.2993
1.48819	-146.028	1.70694	40.6794
1.49514	-143.843	1.71389	35.2223
1.50208	-141.809	1.72083	29.9686
1.50903	-139.419	1.72778	24.2964
1.51597	-136.785	1.73472	18.3012
1.52292	-133.845	1.74167	13.0127
1.52986	-130.621	1.74861	7.93205
1.53681	-127.258	1.75556	2.83931
1.54375	-123.089	1.7625	-2.00011
1.55069	-119.018	1.76944	-7.04294
1.55764	-114.514	1.77639	-11.6717
1.56458	-109.832	1.78333	-16.3159
1.57153	-104.706	1.79028	-20.9468
1.57847	-100.072	1.79722	-25.7423
1.58542	-94.8404	1.80417	-30.3812
1.59236	-89.3258	1.81111	-34.7162
1.59931	-83.3582	1.81806	-39.0123
1.60625	-77.2728	1.825	-42.996
1.61319	-70.6284	1.83194	-47.0782
1.62014	-63.3775	1.83889	-51.1549
1.62708	-56.9088	1.84583	-55.2782
1.63403	-49.4529	1.85278	-59.2211
1.64097	-41.635	1.85972	-62.9334
1.64792	-33.7234	1.86667	-66.3544
1.65486	-26.2616	1.87361	-70.159
1.66181	-18.031	1.88056	-73.4857
1.66875	-9.40195	1.8875	-76.6684
1.67569	-0.739812	1.89444	-79.9149
1.68264	7.69276	1.90139	-82.75
1.68958	16.1611	1.90833	-85.6234
1.69653	24.3877	1.91528	-88.1112
1.70347	32.1847	1.92222	-90.6392
1.71042	40.2889	1.92917	-92.6914
1.71736	47.9573	1.93611	-94.7709
1.72431	55.5009	1.94306	-96.7283
1.73125	63.1107	1.95	-98.5265
1.73819	70.8237	1.95694	-100.064
1.74514	77.843	1.96389	-101.8
1.75208	84.3677	1.97083	-103.245
1.75903	90.9182	1.97778	-104.213
1.76597	97.1489	1.98472	-105.419
1.77292	103.118	1.99167	-106.496
1.77986	108.698	1.99861	-107.458
1.78681	114.317	2.00556	-108.406
1.79375	120.095	2.0125	-108.966
1.80069	125.872	2.01944	-109.312
1.80764	130.883	2.02639	-109.631
1.81458	135.508	2.03333	-110.136
1.82153	139.37	2.04028	-110.353
1.82847	143.471	2.04722	-110.302
1.83542	146.9	2.05417	-110.036
1.84236	150.272	2.06111	-109.678
1.84931	153.001	2.06806	-108.869
1.85625	155.183	2.075	-107.905
1.86319	157.49	2.08194	-106.981
1.87014	159.463	2.08889	-105.567
1.87708	160.707	2.09583	-104.278
1.88403	161.212	2.10278	-103.005
1.89097	161.777	2.10972	-101.286
1.89792	161.802	2.11667	-99.2223
1.90486	162.328	2.12361	-96.7
1.91181	161.625	2.13056	-93.9189
1.91875	160.733	2.1375	-91.1036
1.92569	159.552	2.14444	-88.2412
1.93264	158.516	2.15139	-85.0709
1.93958	156.837	2.15833	-81.6759
1.94653	154.898	2.16528	-78.0741
1.95347	152.547	2.17222	-74.6369
1.96042	149.446	2.17917	-70.6916
1.96736	146.58	2.18611	-66.589
1.97431	143.055	2.19306	-62.5554
1.98125	139.299	2.2	-57.902
1.98819	135.275	2.20694	-53.7226
1.99514	131.569	2.21389	-49.285
2.00208	127.889	2.22083	-44.7238
2.00903	123.835	2.22778	-40.1496
2.01597	119.457	2.23472	-35.6133
2.02292	115.348	2.24167	-30.6229
2.02986	110.676	2.24861	-25.5923
2.03681	105.839	2.25556	-20.4562
2.04375	101.413	2.2625	-15.17
2.05069	96.7615	2.26944	-9.60703
2.05764	91.9905	2.27639	-3.86682
2.06458	87.0177	2.28333	1.31395
2.07153	81.8161	2.29028	6.45984
2.07847	76.5699	2.29722	11.4755
2.08542	71.2798	2.30417	16.7959
2.09236	65.6698	2.31111	22.4337
2.09931	60.2197	2.31806	27.951
2.10625	54.3555	2.325	32.744
2.11319	49.0443	2.33194	37.9604
2.12014	44.0453	2.33889	43.0868
2.12708	38.7534	2.34583	47.8206
2.13403	32.5201	2.35278	52.4878
2.14097	26.6327	2.35972	56.9798
2.14792	20.4949	2.36667	61.2001
2.15486	14.7099	2.37361	65.726
2.16181	8.79899	2.38056	70.1426
2.16875	2.81189	2.3875	73.9185
2.17569	-3.05571	2.39444	77.5627
2.18264	-9.14764	2.40139	80.6365
2.18958	-15.0661	2.40833	84.3978
2.19653	-21.5322	2.41528	86.6793
2.20347	-28.0438	2.42222	89.8671
2.21042	-34.6883	2.42917	92.7054
2.21736	-40.5414	2.43611	94.3965
2.22431	-46.0998	2.44306	96.7261
2.23125	-51.583	2.45	99.27
2.23819	-57.5291	2.45694	101.198
2.24514	-63.1606	2.46389	103.236
2.25208	-68.7234	2.47083	105.103
2.25903	-74.1962	2.47778	106.351
2.26597	-79.2118	2.48472	107.631
2.27292	-84.0488	2.49167	108.43
2.27986	-88.4509	2.49861	109.718
2.28681	-93.0655	2.50556	109.625
2.29375	-97.2033	2.5125	109.929
2.30069	-101.383	2.51944	110.887
2.30764	-105.262	2.52639	110.847
2.31458	-108.706	2.53333	109.999
2.32153	-111.361	2.54028	109.333
2.32847	-114.346	2.54722	108.674
2.33542	-116.947	2.55417	107.914
2.34236	-119.474	2.56111	107.076
2.34931	-122.012	2.56806	106.15
2.35625	-124.024	2.575	104.848
2.36319	-126.143	2.58194	103.788
2.37014	-128.11	2.58889	102.221
2.37708	-129.46	2.59583	100.263
2.38403	-130.543	2.60278	98.139
2.39097	-131.659	2.60972	95.8289
2.39792	-132.604	2.61667	94.2698
2.40486	-133.66	2.62361	92.4023
2.41181	-134.456	2.63056	89.7991
2.41875	-134.965	2.6375	87.1594
2.42569	-135.118	2.64444	84.6351
2.43264	-135.024	2.65139	82.1136
2.43958	-134.564	2.65833	79.233
2.44653	-133.964	2.66528	75.9731
2.45347	-133.049	2.67222	73.0394
2.46042	-132.121	2.67917	69.7537
2.46736	-131.085	2.68611	66.4149
2.47431	-129.885	2.69306	63.0733
2.48125	-128.347	2.7	58.8062
2.48819	-126.39	2.70694	55.089
2.49514	-124.058	2.71389	50.8656
2.50208	-121.568	2.72083	46.8473
2.50903	-119.058	2.72778	42.539
2.51597	-116.533	2.73472	37.8975
2.52292	-113.904	2.74167	33.4728
2.52986	-110.564	2.74861	28.6758
2.53681	-107.27	2.75556	24.134
2.54375	-104.107	2.7625	19.8147
2.55069	-99.9783	2.76944	15.2275
2.55764	-96.297	2.77639	10.6099
2.56458	-92.6196	2.78333	6.55797
2.57153	-88.6415	2.79028	1.87204
2.57847	-83.7751	2.79722	-2.05821
2.58542	-78.6399	2.80417	-6.55567
2.59236	-73.5043	2.81111	-10.6914
2.59931	-68.2429	2.81806	-14.6035
2.60625	-62.8385	2.825	-18.637
2.61319	-57.2342	2.83194	-22.3061
2.62014	-51.4805	2.83889	-26.1084
2.62708	-44.8472	2.84583	-30.1685
2.63403	-38.9972	2.85278	-33.8901
2.64097	-32.2897	2.85972	-37.3761
2.64792	-25.6764	2.86667	-41.2933
2.65486	-19.083	2.87361	-44.8137
2.66181	-13.536	2.88056	-48.7427
2.66875	-8.11279	2.8875	-52.4846
2.67569	-2.36371	2.89444	-56.2735
2.68264	3.88506	2.90139	-59.7011
2.68958	9.98579	2.90833	-63.0087
2.69653	15.4333	2.91528	-66.017
2.70347	21.7815	2.92222	-69.2009
2.71042	27.2467	2.92917	-72.2047
2.71736	32.9217	2.93611	-74.9663
2.72431	38.6363	2.94306	-77.9483
2.73125	44.4613	2.95	-80.6863
2.73819	49.914	2.95694	-83.4491
2.74514	55.7093	2.96389	-85.8826
2.75208	61.5922	2.97083	-88.0142
2.75903	67.2976	2.97778	-90.2413
2.76597	72.7575	2.98472	-92.6528
2.77292	78.4133	2.99167	-94.7938
2.77986	84.2445	2.99861	-97.2327
2.78681	88.8973	3.00556	-98.9826
2.79375	93.6162	3.0125	-100.632
2.80069	98.1391	3.01944	-102.141
2.80764	102.19	3.02639	-103.32
2.81458	106.142	3.03333	-104.419
2.82153	110.354	3.04028	-105.138
2.82847	114.562	3.04722	-106.028
2.83542	117.904	3.05417	-106.372
2.84236	120.635	3.06111	-106.711
2.84931	123.523	3.06806	-106.715
2.85625	126.239	3.075	-106.911
2.86319	128.415	3.08194	-106.691
2.87014	130.882	3.08889	-106.746
2.87708	133.172	3.09583	-106.414
2.88403	135.305	3.10278	-106.208
2.89097	136.838	3.10972	-105.586
2.89792	138.359	3.11667	-104.803
2.90486	139.392	3.12361	-104.174
2.91181	140.154	3.13056	-102.958
2.91875	140.667	3.1375	-102.179
2.92569	141.163	3.14444	-100.881
2.93264	141.275	3.15139	-99.707
2.93958	140.291	3.15833	-97.6848
2.94653	140.301	3.16528	-95.099
2.95347	139.309	3.17222	-92.2771
2.96042	139.077	3.17917	-89.621
2.96736	138.252	3.18611	-86.8119
2.97431	137.481	3.19306	-84.2091
2.98125	136.12	3.2	-81.2138
2.98819	135.237	3.20694	-78.4762
2.99514	133.472	3.21389	-75.6898
3.00208	131.848	3.22083	-72.2637
3.00903	130.553	3.22778	-69.2412
3.01597	128.967	3.23472	-65.7399
3.02292	127.259	3.24167	-62.6847
3.02986	124.604	3.24861	-60.031
3.03681	122.299	3.25556	-56.763
3.04375	118.925	3.2625	-53.6991
3.05069	115.793	3.26944	-50.3769
3.05764	111.985	3.27639	-46.8713
3.06458	108.321	3.28333	-42.6982
3.07153	103.353	3.29028	-38.7348
3.07847	99.0497	3.29722	-34.6144
3.08542	94.4959	3.30417	-30.4668
3.09236	89.8834	3.31111	-26.109
3.09931	85.2464	3.31806	-21.9993
3.10625	80.7583	3.325	-17.6964
3.11319	75.6091	3.33194	-12.5785
3.12014	71.0387	3.33889	-7.88482
3.12708	66.1066	3.34583	-3.10527
3.13403	61.067	3.35278	1.70691
3.14097	56.5485	3.35972	6.48502
3.14792	51.9768	3.36667	10.5131
3.15486	47.6869	3.37361	15.954
3.16181	43.2056	3.38056	21.0048
3.16875	38.4949	3.3875	25.7646
3.17569	33.6115	3.39444	30.8415
3.18264	28.0736	3.40139	35.7081
3.18958	22.7234	3.40833	40.4525
3.19653	17.3389	3.41528	44.5548
3.20347	11.9639	3.42222	48.6014
3.21042	6.24407	3.42917	53.1042
3.21736	0.808798	3.43611	57.2097
3.22431	-4.57783	3.44306	61.0708
3.23125	-9.75924	3.45	65.1367
3.23819	-15.3801	3.45694	68.9395
3.24514	-20.8525	3.46389	72.9607
3.25208	-25.9098	3.47083	76.1729
3.25903	-31.1013	3.47778	79.1967
3.26597	-36.119	3.48472	82.5882
3.27292	-40.963	3.49167	86.1691
3.27986	-45.5102	3.49861	89.5505
3.28681	-50.5717	3.50556	92.7549
3.29375	-54.8393	3.5125	95.764
3.30069	-59.3195	3.51944	98.8243
3.30764	-63.6058	3.52639	101.914
3.31458	-67.896	3.53333	104.495
3.32153	-71.9666	3.54028	106.432
3.32847	-76.3681	3.54722	108.476
3.33542	-80.2633	3.55417	111.182
3.34236	-83.9215	3.56111	113.592
3.34931	-87.2579	3.56806	115.883
3.35625	-90.6522	3.575	117.12
3.36319	-93.5626	3.58194	118.269
3.37014	-96.3709	3.58889	119.62
3.37708	-98.7307	3.59583	120.501
3.38403	-101.099	3.60278	121.619
3.39097	-103.277	3.60972	122.037
3.39792	-105.352	3.61667	123.089
3.40486	-107.03	3.62361	123.854
3.41181	-108.172	3.63056	123.917
3.41875	-109.329	3.6375	123.916
3.42569	-110.094	3.64444	123.838
3.43264	-110.788	3.65139	123.172
3.43958	-111.187	3.65833	123.306
3.44653	-111.496	3.66528	123.319
3.45347	-111.675	3.67222	122.196
3.46042	-111.521	3.67917	121.464
3.46736	-111.574	3.68611	120.867
3.47431	-111.404	3.69306	119.384
3.48125	-111.121	3.7	117.545
3.48819	-110.699	3.70694	116.039
3.49514	-109.713	3.71389	114.199
3.50208	-108.82	3.72083	112.433
3.50903	-107.967	3.72778	109.743
3.51597	-106.683	3.73472	107.362
3.52292	-105.239	3.74167	104.284
3.52986	-103.625	3.74861	100.967
3.53681	-101.628	3.75556	98.5899
3.54375	-99.7752	3.7625	95.2825
3.55069	-97.3668	3.76944	91.5762
3.55764	-94.6143	3.77639	88.6903
3.56458	-91.6452	3.78333	85.5548
3.57153	-88.3498	3.79028	81.4302
3.57847	-84.973	3.79722	77.6836
3.58542	-81.8314	3.80417	73.2488
3.59236	-78.4518	3.81111	69.7367
3.59931	-75.1085	3.81806	65.4592
3.60625	-71.6198	3.825	61.1527
3.61319	-68.1612	3.83194	56.7557
3.62014	-64.3549	3.83889	51.7684
3.62708	-60.5737	3.84583	47.1064
3.63403	-56.7619	3.85278	41.8501
3.64097	-53.472	3.85972	37.3347
3.64792	-50.2529	3.86667	31.9486
3.65486	-46.5773	3.87361	27.1961
3.66181	-42.9915	3.88056	22.2347
3.66875	-38.5708	3.8875	17.2659
3.67569	-34.5763	3.89444	12.2954
3.68264	-30.0466	3.90139	7.58784
3.68958	-26.2047	3.90833	2.71774
3.69653	-22.2464	3.91528	-1.79185
3.70347	-17.9779	3.92222	-6.42801
3.71042	-13.8207	3.92917	-11.0222
3.71736	-9.53511	3.93611	-15.4929
3.72431	-4.85776	3.94306	-20.1846
3.73125	-0.206027	3.95	-24.2805
3.73819	4.00635	3.95694	-28.6398
3.74514	8.14622	3.96389	-32.3468
3.75208	11.7552	3.97083	-36.3149
3.75903	15.9615	3.97778	-40.8247
3.76597	19.0212	3.98472	-44.6001
3.77292	23.0183	3.99167	-48.0152
3.77986	26.9761	3.99861	-51.5103
3.78681	30.292	4.00556	-54.6998
3.79375	33.6172	4.0125	-57.9306
3.80069	37.3973	4.01944	-61.2193
3.80764	40.962	4.02639	-64.4133
3.81458	44.0094	4.03333	-68.3556
3.82153	46.8389	4.04028	-71.4627
3.82847	49.5488	4.04722	-75.1464
3.83542	52.4763	4.05417	-78.0795
3.84236	55.2658	4.06111	-80.6674
3.84931	58.2039	4.06806	-83.6674
3.85625	60.6284	4.075	-86.4211
3.86319	63.0856	4.08194	-89.1951
3.87014	64.962	4.08889	-92.019
3.87708	66.6266	4.09583	-94.3681
3.88403	67.384	4.10278	-96.5234
3.89097	69.1477	4.10972	-99.1177
3.89792	71.1622	4.11667	-100.552
3.90486	72.7591	4.12361	-102.388
3.91181	74.3431	4.13056	-103.831
3.91875	75.4849	4.1375	-105.118
3.92569	76.8076	4.14444	-106.31
3.93264	78.0635	4.15139	-107.719
3.93958	79.5627	4.15833	-108.951
3.94653	80.8233	4.16528	-109.783
3.95347	81.943	4.17222	-110.037
3.96042	82.8438	4.17917	-110.487
3.96736	84.5786	4.18611	-110.55
3.97431	84.9213	4.19306	-110.207
3.98125	84.715	4.2	-110.004
3.98819	85.4235	4.20694	-109.586
3.99514	85.3169	4.21389	-109.299
4.00208	85.8217	4.22083	-108.748
4.00903	85.1154	4.22778	-108.181
4.01597	84.3684	4.23472	-106.878
4.02292	83.1841	4.24167	-105.386
4.02986	82.1526	4.24861	-104.289
4.03681	81.1012	4.25556	-102.865
4.04375	80.0962	4.2625	-101.086
4.05069	78.2186	4.26944	-99.546
4.05764	76.4267	4.27639	-97.5202
4.06458	74.722	4.28333	-95.6015
4.07153	72.2896	4.29028	-93.4576
4.07847	70.3141	4.29722	-90.9977
4.08542	67.7651	4.30417	-88.6832
4.09236	65.0415	4.31111	-86.2669
4.09931	62.4475	4.31806	-83.9087
4.10625	59.9592	4.325	-81.2874
4.11319	56.77	4.33194	-78.0215
4.12014	53.8449	4.33889	-74.9498
4.12708	50.853	4.34583	-72.2445
4.13403	47.9161	4.35278	-68.3693
4.14097	44.9391	4.35972	-65.2337
4.14792	41.9696	4.36667	-61.5256
4.15486	39.4755	4.37361	-57.5925
4.16181	36.9699	4.38056	-54.0254
4.16875	34.1009	4.3875	-49.9197
4.17569	31.979	4.39444	-45.5235
4.18264	29.5682	4.40139	-41.5681
4.18958	26.6506	4.40833	-37.5767
4.19653	24.1883	4.41528	-33.4344
4.20347	21.6918	4.42222	-29.7626
4.21042	18.8996	4.42917	-25.8281
4.21736	16.2537	4.43611	-22.2107
4.22431	13.3483	4.44306	-17.6133
4.23125	10.9607	4.45	-13.5499
4.23819	7.99117	4.45694	-9.54957
4.24514	4.62304	4.46389	-5.04092
4.25208	1.73732	4.47083	-0.844991
4.25903	-1.77417	4.47778	3.68452
4.26597	-4.954	4.48472	8.23674
4.27292	-8.02856	4.49167	12.7841
4.27986	-11.4016	4.49861	16.5147
4.28681	-14.5406	4.50556	20.8239
4.29375	-17.4715	4.5125	25.2029
4.30069	-20.211	4.51944	29.2252
4.30764	-22.8219	4.52639	32.757
4.31458	-25.828	4.53333	36.9319
4.32153	-28.2318	4.54028	40.5045
4.32847	-30.4952	4.54722	44.1726
4.33542	-33.2005	4.55417	47.5715
4.34236	-35.0665	4.56111	51.0843
4.34931	-37.6917	4.56806	54.4678
4.35625	-39.6284	4.575	57.2101
4.36319	-41.2879	4.58194	60.7733
4.37014	-43.5899	4.58889	64.0613
4.37708	-45.4121	4.59583	67.0964
4.38403	-47.6691	4.60278	69.8166
4.39097	-49.7782	4.60972	72.8542
4.39792	-51.3073	4.61667	75.3748
4.40486	-53.6859	4.62361	78.2598
4.41181	-55.8987	4.63056	80.9936
4.41875	-57.4139	4.6375	82.9619
4.42569	-59.4321	4.64444	84.535
4.43264	-60.5314	4.65139	86.7681
4.43958	-62.2068	4.65833	89.5123
4.44653	-63.7114	4.66528	91.0347
4.45347	-64.9712	4.67222	92.3397
4.46042	-66.4767	4.67917	94.3072
4.46736	-67.6439	4.68611	96.0259
4.47431	-68.8424	4.69306	97.3638
4.48125	-69.8859	4.7	98.6049
4.48819	-70.7045	4.70694	98.8505
4.49514	-71.4515	4.71389	99.0693
4.50208	-72.5518	4.72083	100.111
4.50903	-73.5007	4.72778	100.395
4.51597	-73.9328	4.73472	100.514
4.52292	-74.2009	4.74167	100.81
4.52986	-74.3294	4.74861	100.962
4.53681	-73.9767	4.75556	100.561
4.54375	-73.7969	4.7625	100.218
4.55069	-73.5085	4.76944	99.4809
4.55764	-72.6422	4.77639	98.7792
4.56458	-72.3616	4.78333	97.5732
4.57153	-71.8116	4.79028	97.2678
4.57847	-71.2109	4.79722	96.1959
4.58542	-70.485	4.80417	94.92
4.59236	-69.2112	4.81111	93.8836
4.59931	-68.8997	4.81806	91.9293
4.60625	-68.0956	4.825	89.5904
4.61319	-67.2137	4.83194	87.5352
4.62014	-66.2205	4.83889	85.8164
4.62708	-64.6217	4.84583	83.5621
4.63403	-63.1917	4.85278	81.0702
4.64097	-62.2303	4.85972	78.342
4.64792	-60.6744	4.86667	75.8702
4.65486	-59.2579	4.87361	72.9458
4.66181	-57.4961	4.88056	69.9981
4.66875	-55.5134	4.8875	66.2675
4.67569	-53.8779	4.89444	62.7594
4.68264	-51.1772	4.90139	59.6867
4.68958	-49.2406	4.90833	55.9773
4.69653	-46.9797	4.91528	53.0336
4.70347	-44.6863	4.92222	49.5558
4.71042	-42.5659	4.92917	45.3089
4.71736	-39.7904	4.93611	42.1701
4.72431	-36.7229	4.94306	38.5015
4.73125	-33.8505	4.95	34.9274
4.73819	-30.9232	4.95694	31.6276
4.74514	-27.7025	4.96389	27.8793
4.75208	-24.5169	4.97083	24.8512
4.75903	-21.2312	4.97778	21.5462
4.76597	-18.5636	4.98472	18.2573
4.77292	-15.4845	4.99167	14.538
4.77986	-12.804	4.99861	10.441
4.78681	-10.2354	5.00556	6.44773
4.79375	-7.20405	5.0125	3.2116
4.80069	-4.48477	5.01944	-0.879272
4.80764	-1.75914	5.02639	-4.66348
4.81458	0.565573	5.03333	-8.05822
4.82153	3.28441	5.04028	-11.9283
4.82847	5.63649	5.04722	-15.1948
4.83542	7.96541	5.05417	-18.8669
4.84236	10.0853	5.06111	-22.2837
4.84931	12.1753	5.06806	-25.7873
4.85625	14.5896	5.075	-28.8366
4.86319	17.1912	5.08194	-32.0727
4.87014	19.8614	5.08889	-34.9322
4.87708	21.6907	5.09583	-37.786
4.88403	23.6215	5.10278	-40.7795
4.89097	25.4373	5.10972	-43.4269
4.89792	28.333	5.11667	-46.8337
4.90486	30.7572	5.12361	-49.7734
4.91181	33.2809	5.13056	-52.5958
4.91875	35.4391	5.1375	-55.4534
4.92569	37.6569	5.14444	-58.4811
4.93264	40.1323	5.15139	-61.458
4.93958	41.8511	5.15833	-63.9404
4.94653	43.4726	5.16528	-66.5455
4.95347	44.9051	5.17222	-69.397
4.96042	46.9415	5.17917	-71.8885
4.96736	48.0315	5.18611	-74.0789
4.97431	49.8937	5.19306	-76.1964
4.98125	50.597	5.2	-78.4112
4.98819	51.8123	5.20694	-80.4156
4.99514	52.4256	5.21389	-82.5398
5.00208	53.412	5.22083	-84.4589
5.00903	54.6128	5.22778	-85.8557
5.01597	55.3342	5.23472	-86.9702
5.02292	56.5349	5.24167	-88.2923
5.02986	57.9278	5.24861	-89.4367
5.03681	58.9084	5.25556	-89.8996
5.04375	59.83	5.2625	-91.3413
5.05069	61.4152	5.26944	-92.4072
5.05764	62.1006	5.27639	-93.2403
5.06458	63.1472	5.28333	-93.6587
5.07153	63.8165	5.29028	-93.8886
5.07847	64.5714	5.29722	-93.6229
5.08542	65.3855	5.30417	-93.4933
5.09236	65.7922	5.31111	-93.3281
5.09931	66.1276	5.31806	-93.2076
5.10625	65.9476	5.325	-92.7661
5.11319	65.5305	5.33194	-91.6252
5.12014	65.6776	5.33889	-91.2414
5.12708	65.0358	5.34583	-89.9131
5.13403	64.5249	5.35278	-88.5065
5.14097	63.7688	5.35972	-87.2514
5.14792	63.4594	5.36667	-85.5504
5.15486	63.4511	5.37361	-84.39
5.16181	62.8082	5.38056	-83.0976
5.16875	61.9272	5.3875	-81.2446
5.17569	60.5727	5.39444	-79.5095
5.18264	59.3767	5.40139	-77.2053
5.18958	58.5888	5.40833	-74.9377
5.19653	57.3449	5.41528	-73.0662
5.20347	55.9855	5.42222	-70.6802
5.21042	54.8618	5.42917	-68.2543
5.21736	53.5361	5.43611	-65.8832
5.22431	51.8844	5.44306	-63.4167
5.23125	49.8536	5.45	-60.6218
5.23819	47.227	5.45694	-57.5605
5.24514	45.2397	5.46389	-54.5805
5.25208	42.8639	5.47083	-51.6958
5.25903	40.4981	5.47778	-48.6758
5.26597	38.8781	5.48472	-46.2405
5.27292	36.6923	5.49167	-43.5074
5.27986	35.163	5.49861	-40.9326
5.28681	33.1321	5.50556	-37.6187
5.29375	30.7795	5.5125	-34.4728
5.30069	27.9515	5.51944	-31.1425
5.30764	25.5061	5.52639	-27.6285
5.31458	22.8016	5.53333	-24.0719
5.32153	20.2866	5.54028	-20.9813
5.32847	17.8283	5.54722	-17.8671
5.33542	15.1605	5.55417	-14.3114
5.34236	13.0387	5.56111	-10.6322
5.34931	9.91288	5.56806	-7.02909
5.35625	7.39585	5.575	-3.8573
5.36319	4.17474	5.58194	0.0513767
5.37014	1.19969	5.58889	3.61811
5.37708	-1.37945	5.59583	7.36784
5.38403	-3.91651	5.60278	10.8289
5.39097	-6.4495	5.60972	14.1817
5.39792	-8.70532	5.61667	17.4634
5.40486	-11.3103	5.62361	20.82
5.41181	-14.1292	5.63056	24.83
5.41875	-16.3356	5.6375	28.3544
5.42569	-18.2016	5.64444	31.2996
5.43264	-20.4699	5.65139	34.9687
5.43958	-22.6181	5.65833	38.5207
5.44653	-24.665	5.66528	41.0803
5.45347	-26.7433	5.67222	44.7543
5.46042	-29.0319	5.67917	47.7438
5.46736	-31.4154	5.68611	51.1569
5.47431	-33.3911	5.69306	53.6237
5.48125	-35.889	5.7	56.5609
5.48819	-37.6447	5.70694	59.5742
5.49514	-39.4722	5.71389	61.6006
5.50208	-41.3788	5.72083	63.6304
5.50903	-43.527	5.72778	66.1323
5.51597	-45.2012	5.73472	68.5257
5.52292	-46.9895	5.74167	70.7925
5.52986	-48.9621	5.74861	73.4654
5.53681	-50.433	5.75556	74.7286
5.54375	-51.817	5.7625	75.9123
5.55069	-52.8671	5.76944	77.2886
5.55764	-54.1189	5.77639	78.6897
5.56458	-54.6341	5.78333	80.0649
5.57153	-55.8664	5.79028	81.3599
5.57847	-56.9775	5.79722	82.4956
5.58542	-57.8913	5.80417	83.625
5.59236	-59.0873	5.81111	84.759
5.59931	-59.6223	5.81806	85.3607
5.60625	-60.1008	5.825	85.7923
5.61319	-60.3012	5.83194	85.8095
5.62014	-60.8302	5.83889	86.0049
5.62708	-61.1542	5.84583	86.7006
5.63403	-61.0601	5.85278	86.2108
5.64097	-61.281	5.85972	86.9427
5.64792	-61.3672	5.86667	85.7811
5.65486	-60.8676	5.87361	85.232
5.66181	-60.4054	5.88056	85.1444
5.66875	-59.7022	5.8875	84.6324
5.67569	-58.7618	5.89444	83.7223
5.68264	-58.1055	5.90139	82.8604
5.68958	-57.4308	5.90833	82.1218
5.69653	-56.8011	5.91528	81.4199
5.70347	-55.8133	5.92222	80.9359
5.71042	-54.8337	5.92917	79.9181
5.71736	-53.743	5.93611	79.16
5.72431	-52.53	5.94306	77.6138
5.73125	-51.7763	5.95	76.6542
5.73819	-50.4798	5.95694	75.5467
5.74514	-49.003	5.96389	73.7578
5.75208	-47.3965	5.97083	72.245
5.75903	-46.1227	5.97778	70.4895
5.76597	-44.6905	5.98472	68.2786
5.77292	-43.4061	5.99167	66.7878
5.77986	-41.4829	5.99861	64.3073
5.78681	-39.8102	6.00556	61.6848
5.79375	-38.0926	6.0125	59.1781
5.80069	-36.647	6.01944	56.6688
5.80764	-35.2275	6.02639	54.3837
5.81458	-33.2421	6.03333	52.0831
5.82153	-31.8719	6.04028	49.1327
5.82847	-30.1356	6.04722	46.309
5.83542	-28.6668	6.05417	43.1273
5.84236	-26.6907	6.06111	40.4395
5.84931	-24.2884	6.06806	37.7024
5.85625	-22.1551	6.075	34.3948
5.86319	-20.3005	6.08194	32.15
5.87014	-18.3791	6.08889	29.183
5.87708	-16.0065	6.09583	26.4279
5.88403	-13.6898	6.10278	23.9617
5.89097	-10.7368	6.10972	21.1464
5.89792	-8.69766	6.11667	18.2567
5.90486	-6.15782	6.12361	15.3209
5.91181	-3.76441	6.13056	12.381
5.91875	-1.6478	6.1375	9.61461
5.92569	0.401844	6.14444	6.31335
5.93264	2.0204	6.15139	3.33222
5.93958	4.29956	6.15833	0.257357
5.94653	6.38762	6.16528	-2.83902
5.95347	9.0611	6.17222	-5.84374
5.96042	11.3711	6.17917	-9.16983
5.96736	12.9768	6.18611	-12.8957
5.97431	14.6404	6.19306	-16.5545
5.98125	16.8632	6.2	-19.8082
5.98819	18.4949	6.20694	-22.9943
5.99514	20.4543	6.21389	-25.9895
6.00208	22.1389	6.22083	-29.1483
6.00903	24.061	6.22778	-31.9089
6.01597	25.9599	6.23472	-35.0901
6.02292	27.2773	6.24167	-37.6455
6.02986	29.5539	6.24861	-40.8493
6.03681	30.8802	6.25556	-43.2204
6.04375	31.7264	6.2625	-45.6861
6.05069	33.6022	6.26944	-48.2228
6.05764	34.9485	6.27639	-50.5771
6.06458	36.3906	6.28333	-52.846
6.07153	37.2707	6.29028	-54.791
6.07847	38.51	6.29722	-56.8101
6.08542	40.0854	6.30417	-58.5959
6.09236	41.596	6.31111	-60.3973
6.09931	42.6592	6.31806	-61.9357
6.10625	43.5487	6.325	-63.657
6.11319	44.0918	6.33194	-65.0631
6.12014	44.8706	6.33889	-66.8225
6.12708	46.3757	6.34583	-68.5335
6.13403	47.4691	6.35278	-69.5835
6.14097	48.5151	6.35972	-70.649
6.14792	48.9599	6.36667	-72.1721
6.15486	50.3161	6.37361	-73.4882
6.16181	50.398	6.38056	-74.3122
6.16875	50.7498	6.3875	-75.3001
6.17569	51.3879	6.39444	-76.2299
6.18264	51.1988	6.40139	-76.9303
6.18958	52.0495	6.40833	-77.9885
6.19653	52.3696	6.41528	-78.7179
6.20347	52.7501	6.42222	-79.2749
6.21042	52.7174	6.42917	-79.3356
6.21736	52.5824	6.43611	-79.4953
6.22431	52.2409	6.44306	-79.7825
6.23125	51.4595	6.45	-79.1886
6.23819	50.8776	6.45694	-79.2186
6.24514	50.696	6.46389	-79.0647
6.25208	50.0372	6.47083	-78.2967
6.25903	48.5401	6.47778	-77.7338
6.26597	47.8695	6.48472	-76.7819
6.27292	46.7447	6.49167	-75.5619
6.27986	45.412	6.49861	-74.5034
6.28681	43.8752	6.50556	-73.5838
6.29375	42.0753	6.5125	-72.6353
6.30069	40.3906	6.51944	-71.4599
6.30764	39.0935	6.52639	-69.7223
6.31458	38.9067	6.53333	-68.3465
6.32153	37.6434	6.54028	-66.308
6.32847	36.3027	6.54722	-64.5555
6.33542	35.2597	6.55417	-63.1954
6.34236	34.0195	6.56111	-61.4296
6.34931	33.2501	6.56806	-59.3747
6.35625	32.1127	6.575	-57.8809
6.36319	31.1243	6.58194	-55.5122
6.37014	29.6844	6.58889	-53.4305
6.37708	28.6976	6.59583	-50.8299
6.38403	27.3936	6.60278	-48.3924
6.39097	25.8352	6.60972	-46.1177
6.39792	23.969	6.61667	-43.0403
6.40486	22.3386	6.62361	-40.4404
6.41181	21.0484	6.63056	-37.1342
6.41875	18.9638	6.6375	-33.5501
6.42569	16.612	6.64444	-30.0188
6.43264	14.4389	6.65139	-26.8024
6.43958	12.6958	6.65833	-23.5546
6.44653	10.8884	6.66528	-20.3193
6.45347	8.92212	6.67222	-16.3633
6.46042	7.05267	6.67917	-12.7637
6.46736	5.05395	6.68611	-9.55916
6.47431	3.43438	6.69306	-6.75096
6.48125	1.8927	6.7	-4.34658
6.48819	-0.0604595	6.70694	-1.24298
6.49514	-1.76841	6.71389	1.15278
6.50208	-3.24894	6.72083	3.54628
6.50903	-4.39965	6.72778	6.4143
6.51597	-5.94921	6.73472	8.77987
6.52292	-7.9299	6.74167	12.384
6.52986	-9.99247	6.74861	15.0579
6.53681	-10.7104	6.75556	17.0448
6.54375	-12.3844	6.7625	19.5602
6.55069	-13.2677	6.76944	23.5016
6.55764	-14.9195	6.77639	26.8256
6.56458	-17.2684	6.78333	30.1749
6.57153	-18.2088	6.79028	33.0609
6.57847	-19.9862	6.79722	36.4967
6.58542	-21.5327	6.80417	39.8296
6.59236	-22.6346	6.81111	42.7844
6.59931	-23.5261	6.81806	46.1613
6.60625	-24.37	6.825	48.6506
6.61319	-25.2243	6.83194	51.1053
6.62014	-26.5952	6.83889	54.1985
6.62708	-27.9718	6.84583	56.4198
6.63403	-29.386	6.85278	57.781
6.64097	-30.299	6.85972	59.7384
6.64792	-31.0447	6.86667	61.7392
6.65486	-32.3782	6.87361	63.4146
6.66181	-33.296	6.88056	64.5915
6.66875	-34.4672	6.8875	65.4316
6.67569	-35.3351	6.89444	66.6127
6.68264	-36.5234	6.90139	67.4811
6.68958	-37.8584	6.90833	69.0274
6.69653	-39.0646	6.91528	71.2032
6.70347	-40.155	6.92222	72.2455
6.71042	-40.2995	6.92917	73.3798
6.71736	-40.4396	6.93611	74.2348
6.72431	-41.395	6.94306	75.0488
6.73125	-41.5737	6.95	75.6069
6.73819	-42.4272	6.95694	76.6011
6.74514	-42.8318	6.96389	77.1392
6.75208	-43.0295	6.97083	78.1464
6.75903	-43.0409	6.97778	78.1961
6.76597	-42.8969	6.98472	77.9153
6.77292	-42.7825	6.99167	77.3128
6.77986	-42.9589	6.99861	76.338
6.78681	-43.0754	7.00556	75.357
6.79375	-43.1286	7.0125	74.4849
6.80069	-43.6612	7.01944	73.1724
6.80764	-43.1927	7.02639	71.9999
6.81458	-43.4923	7.03333	70.6741
6.82153	-42.6808	7.04028	68.5926
6.82847	-42.4085	7.04722	67.3191
6.83542	-41.9598	7.05417	65.4066
6.84236	-41.7698	7.06111	62.8437
6.84931	-41.3732	7.06806	60.708
6.85625	-40.4236	7.075	58.4805
6.86319	-39.6149	7.08194	55.7665
6.87014	-38.8342	7.08889	54.0348
6.87708	-38.0564	7.09583	52.0391
6.88403	-37.0531	7.10278	49.9087
6.89097	-35.8827	7.10972	47.655
6.89792	-34.1558	7.11667	44.1804
6.90486	-33.2072	7.12361	41.7862
6.91181	-32.1433	7.13056	38.646
6.91875	-30.614	7.1375	35.4202
6.92569	-29.1996	7.14444	32.8278
6.93264	-28.2694	7.15139	29.4357
6.93958	-27.0634	7.15833	25.9431
6.94653	-25.8675	7.16528	22.6069
6.95347	-24.4624	7.17222	18.1571
6.96042	-23.0837	7.17917	14.0683
6.96736	-21.4895	7.18611	10.546
6.97431	-20.3717	7.19306	6.48607
6.98125	-19.3753	7.2	2.89616
6.98819	-17.2594	7.20694	-1.00411
6.99514	-15.4268	7.21389	-5.62001
7.00208	-13.6764	7.22083	-9.81437
7.00903	-11.6414	7.22778	-13.4926
7.01597	-9.17083	7.23472	-17.3014
7.02292	-7.29059	7.24167	-21.0032
7.02986	-5.1533	7.24861	-24.3903
7.03681	-2.94468	7.25556	-27.3076
7.04375	-0.991986	7.2625	-30.9271
7.05069	0.965436	7.26944	-34.914
7.05764	3.00647	7.27639	-38.7465
7.06458	4.98701	7.28333	-42.0152
7.07153	6.73212	7.29028	-45.4886
7.07847	8.46392	7.29722	-48.1154
7.08542	9.84256	7.30417	-50.9897
7.09236	11.4258	7.31111	-54.5095
7.09931	12.7168	7.31806	-56.6846
7.10625	14.0487	7.325	-59.2671
7.11319	15.7419	7.33194	-61.829
7.12014	17.0094	7.33889	-64.2184
7.12708	18.2232	7.34583	-66.4306
7.13403	19.5297	7.35278	-68.4685
7.14097	21.1655	7.35972	-69.6694
7.14792	22.9061	7.36667	-71.4548
7.15486	23.9367	7.37361	-73.2387
7.16181	25.1394	7.38056	-74.2945
7.16875	26.798	7.3875	-75.1933
7.17569	27.733	7.39444	-75.7071
7.18264	28.6059	7.40139	-76.49
7.18958	29.9573	7.40833	-77.2534
7.19653	30.9706	7.41528	-78.0167
7.20347	31.8856	7.42222	-78.7965
7.21042	32.8985	7.42917	-79.4944
7.21736	34.0857	7.43611	-79.554
7.22431	34.2055	7.44306	-79.8043
7.23125	34.4729	7.45	-79.6473
7.23819	35.2566	7.45694	-78.9631
7.24514	36.0526	7.46389	-79.3474
7.25208	36.5473	7.47083	-79.4145
7.25903	37.1377	7.47778	-79.5253
7.26597	37.8152	7.48472	-79.7734
7.27292	37.7061	7.49167	-79.921
7.27986	37.907	7.49861	-79.9163
7.28681	38.0266	7.50556	-79.5444
7.29375	37.6613
7.30069	37.1725
7.30764	37.3792
7.31458	37.3221
7.32153	36.7432
7.32847	36.0939
7.33542	35.4282
7.34236	35.2743
7.34931	34.958
7.35625	34.157
7.36319	33.0734
7.37014	32.1179
7.37708	31.7124
7.38403	30.8533
7.39097	29.959
7.39792	28.9729
7.40486	27.6926
7.41181	26.9324
7.41875	25.4799
7.42569	23.0778
7.43264	21.0141
7.43958	20.1239
7.44653	18.814
7.45347	17.5171
7.46042	16.7719
7.46736	15.8553
7.47431	14.9433
7.48125	14.0135
7.48819	13.3782
7.49514	11.8641

## Sheet: 4d.Biolum phase
Misaligned feeding impairs memories. Loh et al. 2015
Source data for Figure 4d.
SCN Phase			Hippocampus Phase			Liver Phase
ALIGNED	MISALIGNED		ALIGNED	MISALIGNED		ALIGNED	MISALIGNED
12.2501	14.2166		7.11672	21.1166		21.3833	12.0499
11.25	15.9334		6.28344	21.9667		21.2167	11.7499
10.5499	13.1333		8.71656	21.8501		22.9666	14.4334
13.5833	13.6834		7.54992	21.6		21.3	12.4666
15.2167	11.7667		9.21672	21.6334		21.0499	13.05
11.6834	13.6334		6.38328	21.1834		21.7166	12.6
11.3666	14.6333		10.7167	21.9667		21.3833	13.1333
12.2167	12.1666		8.93328	21.6833		21.2167	13.1834

## Sheet: 4e.Biolum period
Misaligned feeding impairs memories. Loh et al. 2015
Source data for Figure 4e.
SCN Period			Hippocampus Period			Liver Period
ALIGNED	MISALIGNED		ALIGNED	MISALIGNED		ALIGNED	MISALIGNED
25.7	24.5		25.4	24.6		24.9	26.4
25	25.9		24.3	24.5		25.6	25.3
25.6	25.8		24.8	24.5		25.6	25.4
26.3	25.5		25.1	24.5		25.2	25.9
25.2	26.5		24	23.9		25.3	25.7
26.5	25.8		25.2	24.4		25.2	26.5
24.9	25.3		24.8	24.6		25.4	26.2
25.9	26		26	24.3		25.2	26.2

## Sheet: 4f.Biolum damping
Misaligned feeding impairs memories. Loh et al. 2015
Source data for Figure 4f.
SCN Damping Rate			Hippocampus Damping Rate			Liver Damping Rate
ALIGNED	MISALIGNED		ALIGNED	MISALIGNED		ALIGNED	MISALIGNED
-0.348425	-0.165229		-0.165525	-0.467545		-0.303853
-0.127413	-0.552507		-0.390682	-0.362867		-0.297535	-0.282987
-0.442747	-0.286834		-0.244656	-0.325813		-0.387119	-0.328551
-0.388052	-0.34035		-0.281717	-0.276449		-0.360339	-0.0839457
-0.249813	-0.427793		-0.17179	-0.375708		-0.347546	-0.31659
-0.255475	-0.387483		-0.227327	-0.359956		-0.411857	-0.26021
-0.222932	-0.24879		-0.350796	-0.475221		-0.164134	-0.200512
-0.381542	-0.383276		-0.410029	-0.488183		-0.132096	-0.244477
