# Supplementary material for: Misaligned feeding impairs memories
Source: eLife journal article supplement (doi:10.7554/elife.09460), 2015-12-10
Supplement: supp [file elife_poa_e09460_Figure_5_source_data_1.xls]

## Sheet: 5b.pCREB
Misaligned feeding impairs memories. Loh et al. 2015
Source data for Figure 5b.
pCREB a.u.
ZT	ALIGNED	Aligned s.e.m.	MISALIGNED	Misaligned s.e.m.
2	75.56	5.89	59.485	11.961
8	76.044	8.209	65.439	11.839
14	69.093	11.512	63.848	9.509
20	69.975	9.748	41.436	10.348

## Sheet: 5c.Total CREB
Misaligned feeding impairs memories. Loh et al. 2015
Source data for Figure 5c.
total CREB a.u.
ZT	ALIGNED	Aligned s.e.m.	MISALIGNED	Misaligned s.e.m.
2	75.156	6.03	35.491	12.504
8	83.38	6.293	45.742	10.175
14	73.174	5.317	42.05	12.433
20	70.017	2.916	27.341	9.05

## Sheet: 5-S1.bActin
Misaligned feeding impairs memories. Loh et al. 2015
Source data for Figure 5-figure supplement 1.
Beta-Actin a.u.
ZT	ALIGNED	Aligned s.e.m.	MISALIGNED	Misaligned s.e.m.
2	86.4	8.756	87.956	4.081
8	88.752	7.307	85.382	4.461
14	88.038	5.656	81.413	4.956
20	83.915	6.142	80.559	6.907

## Sheet: 5e.LTP
Misaligned feeding impairs memories. Loh et al. 2015
Source data for Figure 5e.
	fEPSP slope (% of baseline)
Time from stimulation (min)	ALIGNED	Aligned s.e.m.	MISALIGNED	Misaligned s.e.m.
-20.8333	100.909	1.07806	100.501	0.791557
-20	100.846	1.00722	100.459	1.07669
-19.1667	100.007	1.07699	100.643	0.922957
-18.3333	99.9191	0.69528	101.484	0.930979
-17.5	100.358	0.82306	100.82	0.776023
-16.6667	100.624	0.501859	100.893	0.725633
-15.8333	99.5514	0.602321	102.904	1.14632
-15	98.2325	0.715817	100.541	1.05289
-14.1667	99.3246	1.05129	100.222	1.2012
-13.3333	100.174	1.15439	99.9073	1.021
-12.5	99.158	1.66346	100.641	0.351326
-11.6667	99.1315	0.921567	101.424	0.874006
-10.8333	99.8282	0.584639	98.3887	0.811559
-10	99.2675	0.615708	101.221	1.23209
-9.16667	98.7058	0.749381	98.0172	0.712421
-8.33333	99.1705	0.657861	98.7264	0.49425
-7.5	99.4422	0.626722	98.3302	1.02078
-6.66667	101.071	0.775423	100.165	0.842459
-5.83333	100.351	0.372233	99.9923	1.11454
-5	100.325	0.663391	97.3642	0.905465
-4.16667	100.667	0.313391	99.6085	1.07635
-3.33333	99.6956	0.359801	99.8839	0.520415
-2.5	100.986	0.549211	99.6223	0.530138
-1.66667	101.229	0.806314	98.156	0.434164
-0.833333	101.025	0.606609	100.086	0.640235
0.0833333	197.424	9.91238	181.126	10.0907
0.916667	240.785	15.4205	209.52	11.1314
1.75	221.273	12.586	191.487	9.03791
2.58333	208.158	11.6249	180.125	7.53047
3.41667	201.02	11.7508	173.879	7.60706
4.25	199.652	10.7895	170.101	6.68139
5.08333	196.826	10.887	168.859	6.75015
5.91667	194.073	9.97333	167.678	6.6882
6.75	192.664	9.31788	166.036	6.94107
7.58333	191.201	9.57385	162.544	6.72466
8.41667	188.633	9.48319	163.276	6.03087
9.25	188.479	9.23794	161.564	6.359
10.0833	187.475	9.16165	162.495	6.45548
10.9167	187.554	9.72625	158.309	6.20507
11.75	187.039	8.50958	159.389	6.65162
12.5833	184.42	9.04142	158.869	6.47756
13.4167	183.364	8.64211	156.187	5.98427
14.25	183.612	8.43151	155.267	6.106
15.0833	183.515	8.9147	154.042	6.44383
15.9167	180.612	8.4453	155.196	6.26061
16.75	180.709	8.37912	155.839	6.2762
17.5833	181.058	8.1901	153.026	5.58589
18.4167	180.017	7.88451	154.038	5.76693
19.25	179.433	8.7262	154.432	5.42447
20.0833	178.532	8.37169	152.539	5.28969
20.9167	179.609	7.5335	152.251	5.6248
21.75	177.318	7.88204	153.799	4.75438
22.5833	175.684	8.49588	150.405	5.35184
23.4167	178.456	8.10763	151.16	5.56647
24.25	175.899	7.67719	150.807	5.25596
25.0833	172.924	7.54862	152.066	5.29557
25.9167	174.369	7.28765	151.879	5.13101
26.75	175.578	7.57061	151.501	5.19628
27.5833	174.841	7.43536	151.024	6.64691
28.4167	173.727	8.29419	149.175	5.43786
29.25	173.702	7.36415	149.185	5.12449
30.0833	172.534	7.47732	148.693	4.96101
30.9167	172.601	8.15363	148.206	5.51981
31.75	170.757	7.40471	148.411	5.1254
32.5833	171.683	7.85251	147.136	5.48929
33.4167	169.866	7.85254	148.178	5.88601
34.25	170.579	7.91833	147.389	5.35036
35.0833	169.674	7.1495	147.542	5.94929
35.9167	170.537	7.61616	147.196	5.61661
36.75	169.963	7.79972	146.935	5.14938
37.5833	170.599	7.51442	146.522	4.87937
38.4167	168.973	7.81485	145.344	5.64899
39.25	168.685	8.39521	144.532	5.44631
40.0833	170.001	7.90502	144.01	5.50186
40.9167	168.394	7.50368	144.243	5.09804
41.75	168.732	7.18044	143.802	5.40382
42.5833	168.786	6.69485	146.346	6.04289
43.4167	168.332	7.63076	145.207	5.15113
44.25	166.946	6.85033	144.879	5.62738
45.0833	166.842	7.29714	144.006	5.63274
45.9167	166.352	7.03309	146.123	5.99272
46.75	166.882	7.02262	142.955	5.02262
47.5833	166.611	6.44161	143.953	6.26943
48.4167	165.461	6.92104	143.607	5.9031
49.25	166.195	6.73213	144.701	6.12943
50.0833	166.652	6.95843	144.559	6.0318
50.9167	164.261	6.684	143.67	6.46496
51.75	163.873	7.07609	142.228	5.55848
52.5833	163.857	6.91596	143.167	5.19129
53.4167	164.278	6.79168	143.232	6.20313
54.25	163.771	6.53745	142.371	5.57768
55.0833	163.617	7.14357	142.32	5.24616
55.9167	163.639	7.47209	142.404	5.83747
56.75	163.854	6.8405	139.677	6.02867
57.5833	164.522	7.07636	140.936	5.56968
58.4167	164.289	6.7207	141.586	5.68849
59.25	164.508	6.5199	141.876	5.38518
60.0833	164.67	7.12707	142.061	5.42756

## Sheet: 5f.PPF
Misaligned feeding impairs memories. Loh et al. 2015
Source data for Figure 5f.
Inter-Pulse Interval (msec)	ALIGNED	Aligned s.e.m.	MISALIGNED	Misaligned s.e.m.
25	1.57341	0.0285147	1.52693	0.0313975
50	1.6715	0.0301213	1.63213	0.0302853
100	1.5424	0.0274177	1.53992	0.0243838
200	1.30133	0.0190092	1.30331	0.0173863

## Sheet: 5-S2.Ad Lib LTP
Misaligned feeding impairs memories. Loh et al. 2015
Source data for Figure 5-figure supplement 2.
Aligned data from Fig. 5e
	fEPSP slope (% of baseline)
Time from stimulation (min)	ALIGNED	Aligned s.e.m.	Ad Libitum	Ad Libitum s.e.m.
-20.8333	100.909	1.07806	0.990949	0.0190581
-20	100.846	1.00722	1.01383	0.0219955
-19.1667	100.007	1.07699	0.995099	0.00952968
-18.3333	99.9191	0.69528	1.00024	0.00901792
-17.5	100.358	0.82306	0.99596	0.0182457
-16.6667	100.624	0.501859	0.990665	0.0154316
-15.8333	99.5514	0.602321	1.00048	0.015715
-15	98.2325	0.715817	0.99086	0.0137897
-14.1667	99.3246	1.05129	1.00283	0.00677545
-13.3333	100.174	1.15439	0.97086	0.0120052
-12.5	99.158	1.66346	0.976344	0.0105539
-11.6667	99.1315	0.921567	0.989221	0.0105736
-10.8333	99.8282	0.584639	1.00443	0.00608497
-10	99.2675	0.615708	1.00088	0.0141967
-9.16667	98.7058	0.749381	1.00377	0.00558456
-8.33333	99.1705	0.657861	1.00355	0.0109253
-7.5	99.4422	0.626722	0.990285	0.00375636
-6.66667	101.071	0.775423	0.999748	0.0109757
-5.83333	100.351	0.372233	1.02183	0.00875442
-5	100.325	0.663391	1.0323	0.0176938
-4.16667	100.667	0.313391	1.01047	0.0179139
-3.33333	99.6956	0.359801	0.994851	0.00353321
-2.5	100.986	0.549211	1.00607	0.0111686
-1.66667	101.229	0.806314	1.01367	0.0179208
-0.833333	101.025	0.606609	1.0008	0.0102097
0.0833333	197.424	9.91238	2.08219	0.11128
0.916667	240.785	15.4205	2.50247	0.1151
1.75	221.273	12.586	2.25965	0.0693569
2.58333	208.158	11.6249	2.06779	0.0697798
3.41667	201.02	11.7508	2.00966	0.07351
4.25	199.652	10.7895	1.99987	0.0772911
5.08333	196.826	10.887	1.91971	0.072526
5.91667	194.073	9.97333	1.9132	0.0707367
6.75	192.664	9.31788	1.966	0.0543746
7.58333	191.201	9.57385	1.91592	0.0790484
8.41667	188.633	9.48319	1.90817	0.0699757
9.25	188.479	9.23794	1.90044	0.0712973
10.0833	187.475	9.16165	1.92986	0.0612967
10.9167	187.554	9.72625	1.87804	0.0559664
11.75	187.039	8.50958	1.82497	0.0612166
12.5833	184.42	9.04142	1.8579	0.0494607
13.4167	183.364	8.64211	1.84981	0.0610889
14.25	183.612	8.43151	1.88344	0.053997
15.0833	183.515	8.9147	1.85832	0.0602415
15.9167	180.612	8.4453	1.84835	0.0638443
16.75	180.709	8.37912	1.83169	0.0629336
17.5833	181.058	8.1901	1.86055	0.0429304
18.4167	180.017	7.88451	1.82101	0.0489949
19.25	179.433	8.7262	1.81875	0.0551836
20.0833	178.532	8.37169	1.87036	0.048323
20.9167	179.609	7.5335	1.81522	0.0596548
21.75	177.318	7.88204	1.7997	0.0596678
22.5833	175.684	8.49588	1.82785	0.0487116
23.4167	178.456	8.10763	1.79596	0.0566672
24.25	175.899	7.67719	1.82824	0.0545052
25.0833	172.924	7.54862	1.79685	0.0487557
25.9167	174.369	7.28765	1.7836	0.0537512
26.75	175.578	7.57061	1.79332	0.0485082
27.5833	174.841	7.43536	1.79792	0.0521029
28.4167	173.727	8.29419	1.80812	0.0454889
29.25	173.702	7.36415	1.81718	0.05036
30.0833	172.534	7.47732	1.82242	0.0354148
30.9167	172.601	8.15363	1.79435	0.0289128
31.75	170.757	7.40471	1.82073	0.0584437
32.5833	171.683	7.85251	1.79965	0.0541308
33.4167	169.866	7.85254	1.76691	0.062907
34.25	170.579	7.91833	1.76335	0.0523353
35.0833	169.674	7.1495	1.76071	0.0480516
35.9167	170.537	7.61616	1.73792	0.0500183
36.75	169.963	7.79972	1.80058	0.0426969
37.5833	170.599	7.51442	1.73297	0.0409788
38.4167	168.973	7.81485	1.7721	0.0386491
39.25	168.685	8.39521	1.73025	0.0368495
40.0833	170.001	7.90502	1.76386	0.0498891
40.9167	168.394	7.50368	1.7493	0.0411146
41.75	168.732	7.18044	1.73677	0.0497389
42.5833	168.786	6.69485	1.76491	0.0492175
43.4167	168.332	7.63076	1.76141	0.0333808
44.25	166.946	6.85033	1.76173	0.0470761
45.0833	166.842	7.29714	1.76537	0.0648825
45.9167	166.352	7.03309	1.79645	0.0536134
46.75	166.882	7.02262	1.76094	0.0522891
47.5833	166.611	6.44161	1.76922	0.0482269
48.4167	165.461	6.92104	1.72249	0.0434179
49.25	166.195	6.73213	1.74099	0.0495499
50.0833	166.652	6.95843	1.75246	0.0547505
50.9167	164.261	6.684	1.74455	0.0569268
51.75	163.873	7.07609	1.73325	0.0608256
52.5833	163.857	6.91596	1.77768	0.0478438
53.4167	164.278	6.79168	1.74744	0.0664546
54.25	163.771	6.53745	1.69714	0.0974159
55.0833	163.617	7.14357	1.72066	0.0598799
55.9167	163.639	7.47209	1.72078	0.0709503
56.75	163.854	6.8405	1.74204	0.0605398
57.5833	164.522	7.07636	1.72881	0.0622813
58.4167	164.289	6.7207	1.73862	0.0726503
59.25	164.508	6.5199	1.72483	0.0627852
60.0833	164.67	7.12707	1.70191	0.0680761
