# Supplementary material for: Misaligned feeding impairs memories
Source: eLife journal article supplement (doi:10.7554/elife.09460), 2015-12-10
Supplement: supp [file elife_poa_e09460_Figure_6_source_data_1.xls]

## Sheet: 6a.Context FC
Misaligned feeding impairs memories. Loh et al. 2015
Source data for Figure 6a.
Day (ZT 2) Freezing (%)			Night (ZT 14) Freezing (%)
ALIGNED	MISALIGNED		ALIGNED	MISALIGNED
40.8163	26.5306		29.1667	18.75
44.898	20.4082		2.08333	8.33333
36.7347	16.3265		14.5833	31.25
67.3469	10.2041		16.6667	25
68.75	29.1667		0	20.8333
41.6667	31.25		10.4167	8.33333
50	20.8333		6.25	0
41.6667	12.5		6.25	8.33333

## Sheet: 6-S1.FC acquisition
Misaligned feeding impairs memories. Loh et al. 2015
Source data for Figure 6-figure supplement 1.
Day (ZT 2) Acquisition Freezing (%)							Night (ZT 14) Acquisition Freezing (%)
CS-US 1			CS-US 2				CS-US 1			CS-US 2
ALIGNED	MISALIGNED		ALIGNED	MISALIGNED			ALIGNED	MISALIGNED		ALIGNED	MISALIGNED
25	25		62.5	50			12.5	12.5		37.5	50
25	25		62.5	50			12.5	0		37.5	25
25	25		25	50			62.5	37.5		87.5	37.5
50	12.5		87.5	25			12.5	50		37.5	37.5
25	37.5		62.5	62.5			12.5	0		25	37.5
25	25		75	37.5			12.5	37.5		12.5	12.5
37.5	37.5		50	62.5			0	12.5		25	25
62.5	25		62.5	37.5			37.5	25		62.5	50

## Sheet: 6b.NOR
Misaligned feeding impairs memories. Loh et al. 2015
Source data for Figure 6b.
Day (ZT 9) Discrimination Index			Night (ZT 21) Discrimination Index
ALIGNED	MISALIGNED		ALIGNED	MISALIGNED
0.7	0.461111		29.1667	18.75
0.676471	0.343284		2.08333	8.33333
0.315789	0.548837		14.5833	31.25
0.507042	0.826471		16.6667	25
0.466667	0.227848		0	20.8333
0.75	0.619342		10.4167	8.33333
0.194969	0.429104		6.25	0
0.75			6.25	8.33333
